# Supplementary material for: Caveolae and Bin1 form ring-shaped platforms for T-tubule initiation
Source: eLife journal article supplement (doi:10.7554/elife.84139), 2023-04-21
Supplement: fig1-data1 [file Figure 1 - source data 1. Quantification of ring diameter.xlsx]

## Sheet: Feuil1
Cav3 Ab	Cav3 GFP
0.467	0.55
0.492	0.492
0.397	0.622
0.55	0.704
0.492	0.55
0.492	0.467
0.55	0.492
0.592	0.397
0.622	0.622
0.592	0.55
0.696	0.492
0.641	0.492
0.738	1.038
0.467	0.838
0.55	0.492
0.492	0.55
0.55	0.397
0.738	0.467
0.55	0.704
0.641	0.397
0.859	0.641
0.641	0.397
0.793	0.55
0.641	0.704
0.793	0.55
0.704	0.55
0.641	0.738
0.641	0.55
0.641	0.704
0.55	0.397
0.622	0.492
0.793	0.492
0.704	0.641
0.641	0.704
0.55	0.467
0.704	0.492
0.738	0.397
0.793	0.467
0.55	0.561
0.738	0.55
0.704	0.622
0.859	0.704
64.659	0.492
0.946	0.641
0.704	0.696
0.704	0.454
0.738	0.55
0.887	0.641
0.622	0.55
0.778	0.467
78.111	0.622
0.641	0.838
0.738	0.492
0.641	0.397
0.704	0.641
0.838	0.55
0.641	0.622
0.859	0.887
0.704	0.704
0.887	0.738
0.738	0.778
0.838	0.704
0.592	0.641
0.55	0.55
0.55	0.592
0.592	0.641
0.704	0.641
0.946	0.641
1.038	0.492
108.911	0.55
0.592	0.492
0.704	0.467
0.55	0.641
0.592	0.467
0.933	0.641
0.94	0.397
0.801	0.592
0.859	0.592
0.641	0.793
0.622	0.55
0.738	0.738
0.704	0.55
0.55	0.55
120.82	0.592
1.722	0.641
1.038	0.622
0.946	0.492
0.838	0.55
0.887	0.641
0.887	0.704
0.492	1.133
0.738	0.641
0.704	0.592
0.704	0.55
131.506	96.401
0.492	0.55
0.641	0.561
0.492	0.704
0.55	0.492
0.859	0.641
0.55	0.696
0.55	0.55
0.622	0.55
0.641	0.738
0.492	0.738
0.641	0.641
0.641	0.641
0.622	0.738
0.55	0.801
0.592	0.622
0.696	0.641
0.704	0.738
0.492	0.738
0.467	0.887
0.492	0.641
0.55	0.738
0.704	0.467
0.641	0.55
0.492	0.592
70.005	0.704
0.55	0.778
0.738	0.641
0.641	0.641
0.704	0.984
0.641	0.55
0.704	0.887
0.55	0.641
0.467	0.704
0.467	0.641
0.641	0.55
0.793	0.641
0.622	0.94
0.738	0.467
0.778	0.704
0.641	0.55
0.704	0.622
0.738	0.55
0.55	0.622
0.696	0.793
0.859	0.622
0.467	0.704
0.55	0.55
0.561	0.55
0.704	0.622
0.738	0.641
0.696	0.492
0.933	0.704
0.738	0.55
0.641	0.55
0.622	0.397
0.704	0.592
0.704	0.641
0.641	0.738
0.641	0.738
0.859	0.55
1.014	0.859
0.55	0.838
0.55	0.704
72.926	0.793
0.467	0.641
0.946	0.793
0.492	0.859
0.592	0.859
0.592	0.838
0.704	0.793
0.622	1.044
0.492	0.641
0.641	0.622
0.793	0.793
0.793	0.696
0.641	0.492
0.704	0.696
0.696	0.467
0.622	0.622
0.793	0.397
0.55	1.038
0.738	0.55
0.946	0.838
0.55	0.622
0.704	0.467
0.641	0.397
0.592	0.454
0.738	0.397
0.592	0.592
0.704	0.397
0.738	0.397
0.793	0.55
0.887	0.641
0.641	0.592
0.793	0.704
106.422	0.55
0.793	0.641
0.793	0.55
0.641	0.397
0.622	0.55
0.592	0.492
0.492	0.641
0.641	0.641
0.55	0.641
0.492	0.55
0.55	0.859
0.467	0.55
0.622	0.454
0.492	0.454
0.704	0.669
0.55	0.467
0.641	0.622
0.641	0.592
0.641	0.55
0.738	0.55
0.887	0.641
0.641	0.492
0.704	0.397
0.778	0.397
0.704	0.397
0.55	0.397
0.55	0.492
0.622	0.492
0.704	0.397
0.641	0.492
0.622	0.641
0.641	0.467
0.704	0.348
0.622	0.467
0.641	0.622
0.592	0.492
0.622	0.94
0.55	0.592
0.55	0.738
0.55	0.641
0.454	0.561
0.704	0.561
0.704	0.55
0.641	0.55
0.641	0.801
0.696	0.397
0.704	0.592
0.838	0.55
0.704	1.1
0.622	0.55
0.592	0.397
0.55	1.19
0.622	0.641
0.55	0.704
0.55	0.622
0.592	0.641
0.738	0.467
0.55	0.592
0.622	0.641
0.55	0.397
0.641	0.592
0.592	0.55
0.55	0.397
0.467	0.492
0.622	0.492
0.622	0.55
0.738	0.592
0.793	0.622
0.641	0.641
0.467	0.622
0.492	0.738
0.592	1.169
0.492	0.641
0.793	0.397
0.641	0.704
0.592	0.492
0.592	0.622
0.397	0.738
0.696	0.592
0.55	0.696
0.55	0.946
0.641	0.55
0.55	0.738
0.704	0.467
0.738	0.311
0.55	0.561
0.704	0.492
0.704	0.492
0.592	0.592
0.704	0.55
0.641	1.044
0.592	0.946
0.55	0.696
0.641	0.641
0.55	0.696
0.55	0.859
0.622	0.641
0.641	0.622
0.704	0.622
0.778	0.738
0.738	0.561
0.704	0.55
0.55	0.704
0.55	0.641
0.641	0.641
0.492	0.492
0.467	0.696
0.622	0.838
0.467	0.561
0.55	0.55
0.55	0.55
0.467	0.492
0.55	0.55
0.55	0.55
0.704	0.467
0.592	0.55
0.641	0.55
0.592	0.984
0.592	0.738
0.793	0.793
0.669	0.641
0.492	0.793
0.492	0.704
0.492	0.641
0.55	0.55
0.641	0.55
0.641	0.704
0.454	0.55
0.55	0.704
0.397	0.55
0.492	0.55
0.311	0.641
0.641	0.55
0.55	0.669
0.492	0.55
0.492	0.492
0.55	0.704
0.492	0.622
0.467	0.704
0.55	0.859
0.622	0.838
0.55	0.55
0.55	0.778
0.622	0.704
0.55	0.492
0.622	0.55
0.467	0.984
0.55	0.704
0.55	0.793
0.622	0.641
0.55	0.55
0.55	0.696
0.592	0.738
0.55	0.55
0.467	0.467
0.467	0.704
0.592	0.838
0.467	0.738
0.641	0.838
0.641	0.55
0.467	0.641
0.641	0.793
0.55	0.887
0.641	0.801
0.641	0.778
0.397	0.984
0.467	0.738
0.492	0.641
0.622	0.793
0.492	0.55
0.492	0.55
0.467	0.641
0.55	0.704
0.55	0.838
0.492	0.641
0.467	0.887
0.55	0.696
0.55	0.55
0.492	0.801
0.641	0.492
0.641	0.704
0.55	0.492
0.55	0.696
0.859	0.592
0.838	0.738
0.793	0.887
0.778	0.704
0.738	0.738
0.859	0.622
0.793	0.738
0.704	0.641
0.859	0.622
0.704	0.592
0.793	0.55
0.778	0.492
0.55	0.467
0.793	0.55
0.622	0.492
0.55	0.704
0.704	0.641
0.592	0.592
0.592	0.55
0.397	0.641
0.622	0.801
0.859	0.467
0.467	0.55
0.738	0.492
0.887	0.55
0.738	0.55
0.492	0.55
0.622	0.592
0.838	0.492
0.55	0.622
0.55	0.704
0.55	0.55
0.738	0.467
0.622	0.467
0.467	0.592
0.561	0.55
0.55	0.55
0.467	0.55
0.696	0.55
0.641	0.55
0.641	0.55
0.704	0.55
0.561	0.55
0.641	0.592
0.641	0.492
0.55	0.55
0.738	0.669
0.592	0.467
0.641	0.55
0.55	0.492
0.622	0.492
1.148	0.622
	0.492
	0.467
	0.641
	0.592
	0.55
	0.397
	0.55
	0.622
	0.397
	0.622
	0.55
	0.641
	0.738
	0.55
	0.592
	0.592
	0.55
	0.55
	0.492
	0.704
	0.397
	0.622
	0.887
	0.696
	0.984
	0.592
	0.55
	0.592
	0.55
	0.793
	1.083
	0.492
	0.55
	0.859
	0.641
	0.55
	0.696
	0.641
	0.641
	0.641
	0.641
	0.778
	0.592
	0.492
	0.622
	0.738
	0.704
	0.704
	0.778
	0.778
	0.838
	0.592
	0.704
	0.793
	0.696
	0.704
	0.622
	0.859
	0.696
	0.946
	0.887
	0.641
	0.696
	0.622
	0.778
	0.859
	1.014
	0.778
	0.838
	0.738
	0.738
	0.641
	0.793
	0.984
	0.984
	0.94
	1.19
	0.622
	0.738
	0.778
	0.94
	1.014
	0.704
	0.793
	0.704
	0.778
	0.793
	0.801
	0.738
	0.801
	0.793
	0.946
	1.1
	0.704
	0.55
	0.793
	0.838
	1.23
	0.887
	0.801
	0.838
	0.704
	0.793
	0.738
	0.793
	0.641
	0.704
	0.887
	0.622
	0.793
	0.592
	0.704
	0.492
	0.641
	0.704
	0.696
	0.984
	0.55
	0.778
	0.55
	0.592
	0.641
	0.55
	0.55
	0.641
	0.778
	0.778
	0.55
	0.696
	0.55
	0.738
	0.704
	0.641
	0.592
	0.641
	1.083
	0.984
	0.592
	0.704
	0.641
	0.738
	0.641
	0.704
	0.397
	0.492
	0.838
	0.641
	0.492
	0.467
	0.887
	0.704
	0.738
	0.641
	0.704
	0.704
	0.641
	0.592
	0.778
	0.793
	0.838
	0.838
	0.887
	0.622
	0.641
	0.704
	0.592
	0.641
	0.592
	0.492
	0.55
	0.778
	0.55
	0.55
	0.704
	0.55
	0.55
	0.738
	0.55
	0.641
	0.696
	0.55
	0.492
	0.778
	0.622
	0.641
	0.738
	0.622
	0.55
	0.492
	0.592
	0.467
	0.793
	0.704
	0.704
	1.083
	0.984
	0.622
	0.55
	0.696
	0.641
	0.801
	0.622
	0.467
	0.592
	0.738
	0.984
	0.801
	0.793
	0.641
	0.592
	0.592
	0.704
	0.641
	0.738
	0.641
	0.467
	0.55
	0.704
	0.946
	0.467
	0.55
	0.859
	0.738
	0.838
	0.738
	1.014
	0.622
	0.738
	0.467
	0.467
	0.622
	0.696
	0.704
	0.738
	0.838
	0.55
	0.641
	0.704
	0.793
	0.55
	0.793
	0.94
	0.859
	0.859
	0.622
	0.793
	0.887
	0.641
	0.984
	0.704
	0.55
	0.738
	0.738
	1.338
	0.592
	0.592
	0.641
	0.641
	0.738
	0.933
	0.641
	1.343
	0.641
	0.55
	0.696
	0.55
	0.622
	0.793
	0.704
	0.946
	0.641
	0.738
	0.801
	0.801
	0.55
	0.641
