# Supplementary material for: Caveolae and Bin1 form ring-shaped platforms for T-tubule initiation
Source: eLife journal article supplement (doi:10.7554/elife.84139), 2023-04-21
Supplement: fig1-data2 [file Figure 1 - source data 2. Quantification of ring diameters from human and mouse myotubes on PREM.xlsx]

## Sheet: Feuil1
human	mouse	ring diameter
805.449	554.602
529.56	304.583
467.388	269.164
327.389	361.513
551.884	608.912
635.46	587.473
687.191	457.565
471.6	842.754
473.488	755.603
336.119	619.368
613.57	499.512
333.652	468.388
482.763	720.632
465.381	598.737
482.433
413.984
438.623
524.049
1113.61
523.412
976.939
959.614
