# Supplementary material for: Caveolae and Bin1 form ring-shaped platforms for T-tubule initiation
Source: eLife journal article supplement (doi:10.7554/elife.84139), 2023-04-21
Supplement: fig1-data3 [file Figure 1 - source data 3. Quantification of the number of caveolae composing a ring from differentiated myotubes.xlsx]

## Sheet: Feuil1
Human	Mouse	caveolae per ring
18	17
11	14
10	16
16	14
17	15
29	17
14	16
13	20
11	16
10
16
15
26
15
13
20
12
36
19
17
