# Supplementary material for: Caveolae and Bin1 form ring-shaped platforms for T-tubule initiation
Source: eLife journal article supplement (doi:10.7554/elife.84139), 2023-04-21
Supplement: fig1-data4 [file Figure 1 - source data 4. Quantification of the average caveolae diameter from differentiated mouse or human myotubes.xlsx]

## Sheet: Feuil1
human	mouse
111.614	80.136
111.614	73.418
79.299	71.219
115.965	69.02
105.09	60.234
112.316	59.99
101.214	86.63
95.009	84.253
91.721	71.107
88.417	86.46
89.175	57.904
121.581	82.127
83.936	64.502
92.567	73.543
92.567	75.424
72.313	79.327
109.874	73.418
78.455	77.938
103.968	77.938
118.464	77.938
109.545	82.224
98.402	47.643
110.164	46.834
73.911	47.982
113.079	50.253
86.583	50.294
93.221	51.374
103.358	53.69
87.043	44.472
73.17	50.253
90.904	52.568
79.043	56.077
95.54	57.199
106.368	46.981
100.022	41.008
75.093	50.337
91.359	57.199
106.095	46.827
93.685	47.982
91.676	47.816
84.728	50.276
78.56	56.694
84.728	49.452
78.744	58.629
87.815	53.275
47.816	45.489
48.907	46.725
48.907	47.816
53.275	45.489
103.542	51.09
87.711	57.533
70.824	55.461
69.703	80.346
81.855	78.318
92.689	71.961
92.729	67.522
92.518	71.961
84.948	78.318
75.466	58.294
97.038	70.604
107.927	69.063
75.288	85.762
75.466	72.363
75.466	74.675
72.589	68.464
83.211	52.631
94.239	63.502
101.732	60.413
97.242	66.792
87.458	83.546
122.11	59.821
92.892	66.968
93.845	75.268
113.279	78.797
91.805	69.271
93.305	64.525
102.819	60.933
79.863	57.375
96.298	52.764
91.035	64.499
87.314	77.491
106.923	57.875
99.292	58.03
89.49	69.742
78.955	53.732
87.513	52.66
78.955	58.914
66.697	62.379
72.11	67.573
81.738	65.58
72.476	65.405
98.202	79.276
85.139	58.74
86.373	68.377
77.874	56.754
89.49	57.657
92.632	53.373
100.268	53.732
77.386	64.163
79.705	57.834
67.965	76.005
73.555	69.742
81.185	68.657
89.785	51.46
89.49	59.994
91.667	63.24
104.535	58.03
85.702	62.157
85.287	55.491
78.474	52.66
88.701	55.035
85.625	79.027
71.272	70.684
93.979	68.772
94.126	73.268
94.126	64.941
78.78	73.47
101.596	79.933
75.363	75.656
100.645	66.748
87.768	66.748
86.553	64.553
67.471	68.828
90.677	66.748
76.272	71.14
69.055	68.944
86.102	77.734
66.681	75.535
78.315	75.856
77.37	68.772
86.315	81.044
68.662	84.187
96.309	66.225
79.534	62.966
80.762	68.772
69.055	61.785
79.057	66.225
76.159	61.157
111.085	57.855
81.535	61.785
96.309	63.686
91.153	63.686
81.958	62.966
80.762	53.638
86.102	68.106
79.711	56.319
73.264	55.313
75.917	63.686
89.222	62.35
76.428	59.234
80.922	62.966
92.355	79.299
95.26	75.328
83.189	70.665
89.452	79.629
71.818	85.787
65.767	64.206
62.617	64.206
60.634	68.51
58.547	68.51
72.79	74.693
83.656	64.206
72.104	73.901
99.849	72.822
70.665	74.98
70.985	68.51
73.544	66.786
98.167	70.665
97.957	70.665
89.016	70.665
104.204	74.98
99.229	62.029
84.274	60.111
89.016	58.568
91.932	58.568
83.189	54.172
90.031	56.79
75.388	58.568
82.314	69.969
75.388	58.568
88.327	64.745
87.696	57.026
88.092	59.887
95.2	64.537
77.894	53.696
107.506	62.986
77.894	49.835
70.37
91.012
87.696
84.016
82.261
79.828
83.964
75.983
83.717
86.633
76.44
80.378
92.663
72.484
100.975
72.484
66.96
66.777
81.625
77.737
79.932
97.769
103.27
85.76
80.435
82.028
80.435
80.435
80.057
87.919
67.746
72.411
64.467
56.879
61.438
65.956
62.993
76.937
73.477
65.737
75.702
58.909
75.702
77.255
69.495
69.495
74.149
75.524
74.149
69.495
80.195
71.046
67.746
79.01
72.816
80.56
95.224
85.218
83.564
88.139
92.808
