# Supplementary material for: Caveolae and Bin1 form ring-shaped platforms for T-tubule initiation
Source: eLife journal article supplement (doi:10.7554/elife.84139), 2023-04-21
Supplement: fig1-figsupp2-data1 [file Figure 1- figure supplement 2 - source data1. Quantification of ring diameter labeled by MemBright.xlsx]

## Sheet: Feuil1
Diameter (nm)
858
530
687
895
621
658
824
514
416
562
329
530
336
441
596
885
837
479
699
589
465
395
687
607
566
895
795
607
767
651
677
1021
712
395
566
895
989
878
651
770
1007
699
843
949
514
479
767
671
465
661
441
958
416
530
479
501
709
624
832
354
421
421
354
648
744
744
658
354
566
792
1030
750
596
885
677
416
558
501
607
416
461
607
648
699
479
479
562
661
750
792
566
1085
465
724
530
501
750
607
562
543
530
724
1479
1063
750
1242
1825
