# Supplementary material for: Caveolae and Bin1 form ring-shaped platforms for T-tubule initiation
Source: eLife journal article supplement (doi:10.7554/elife.84139), 2023-04-21
Supplement: fig5-data1 [file Figure 5 - source data 1. Measurements of ring diameters and tube length in vitro.xlsx]

## Sheet: Feuil1
Diameter	Nb of tubes	tube1 length	smaller tubes
151.989	2	559.292	847.919
408.163	6	2957.47	1665.79
541.847	5	509.393	1046.06
428.26	5	1727.7	710.604
389.833	5	697.733	520.856
385.477	3	3152.79	119.425
152.304	4	830.36	220.808
318.308	4	1406.1	192.1
118.761	4	1061.08	90.395
283.146	5	1506.48	648.996
268.196	7	1532.35	577.423
618.641	6	726.093	459.414
399.733	5	969.765	365.833
740.539			274.603
585.085			263.746
268.107			142.101
			117.909
			357.152
			325.538
			118.435
			157.066
			103.806
			474.342
			701.552
			1260.62
			1053.14
			169.285
			590.812
			423.129
			268.026
			179.931
			276.312
			533.679
			580.187
			342.237
			534.18
			555.344
			280.887
			160.026
			126.818
			138.788
			502.219
			404.099
			258.65
			339.85
			119.989
			119.571
