# Supplementary material for: Caveolae and Bin1 form ring-shaped platforms for T-tubule initiation
Source: eLife journal article supplement (doi:10.7554/elife.84139), 2023-04-21
Supplement: fig5-data2 [file Figure 5 - source data 2. Measurements of ring diameters and tube length in cellulo.xlsx]

## Sheet: Feuil1
Diameter	Nb of tubes	tube 1 length	smaller tubes
1168.26	6	2563.25	398.549
525.242	7	2346.49	657.433
627.184	2	1220.26	467.184
817.677	4	1980.95	630.141
872.211	3	2169.35	438.644
772.053	6	3630.03	330.036
630.768	2	1874.89	497.273
659.298	5	1967.97	571.824
1307.91	4	2947.89	756.142
664.568	6	2234.87	287.558
647.702	3	1349.35	299.948
1086.7	4	1458.87	341.258
971.625	3	982.4	390.068
561.812	4	2927.57	156.991
607.511	3	5115.78	189.669
642.596	2	957.663	1030.35
563.518	9	1803.25	505.252
578.971	2	2388.29	227.34
596.927	4		554.492
615.095	3		388.38
			303.728
			208.198
			743.846
			713.19
			1985
			341.696
			563.44
			1985
			413.879
			403.707
			715.675
			445.225
			752.125
			324.074
			671.278
			321.925
			1284.5
			357.732
			773.179
			577.87
			477.793
			349.928
			1118.3
			811.86
			330.201
			852.028
			1342.77
			527.152
			577.361
			559.328
			548.543
			616.378
			1673.52
			460.988
			635.603
			497.684
			1078.06
			363.889
			627.565
			200.47
			286.802
			726.352
			510.204
			434.548
			178.571
			819.405
			519.031
			410.678
			359.527
			391.118
			907.879
			245.44
