# Supplementary material for: Caveolae and Bin1 form ring-shaped platforms for T-tubule initiation
Source: eLife journal article supplement (doi:10.7554/elife.84139), 2023-04-21
Supplement: fig5-figsupp1-data1 [file Figure 5-figure supplement 1-source data 1. Quantification of tubule density in Bin1-exon11 vs Bin1+exon 11.xlsx]

## Sheet: Feuil1
ctrl-ex11	ctrl+ex11
0.00102955	0.00626686
0.000443161	0.0145287
0.000529159	0.00904528
0.000775085	0.00532677
0.00046521	0.00257135
0.00137779	0.0205659
0.00171881	0.026455
0.00278563	0.0049849
0.00084486	0.00893277
0.00160321	0.0111547
0.00181593	0.0169893
0.00155546	0.00784372
0.00489054	0.00240425
0.00187786	0.00612966
0.000621303	0.001042
0.00211874	0.00278535
0.00353158	0.00206283
0.000206948	0.00404387
0.00113894	0.0141014
0.000433928	0.0206281
0.000562591	0.00577233
0.00075501	0.0144033
0.000219712	0.00190554
0.000537285	0.0041191
	0.0047482
