# Supplementary material for: Caveolae and Bin1 form ring-shaped platforms for T-tubule initiation
Source: eLife journal article supplement (doi:10.7554/elife.84139), 2023-04-21
Supplement: fig5-figsupp1-data2 [file Figure 5-figure supplement 1-source data 2. Quantification of caveolae ring density Bin1-exon11 vs Bin1+exon 11.xlsx]

## Sheet: Feuil1
exon11-	exon11+
0.00220728	0.00369584
0.0103751	0.0357723
0.00846655	0.0172645
0.00396299	0.00599981
0.00895563	0.0137106
0.00279307	0.0104428
0.00779976	0.00276488
0.00295701	0.00502469
0.0064718	0.00373873
0.00453982	0.00315624
0.00235005	0.00191978
0.00709817	0.00391293
0.00697577	0.00218606
0.00375944	0.0018852
0.00797258	0.00236769
0.0118424	0.00443931
0.0157915
0.00746657
0.00505337
0.00367456
