# Supplementary material for: Caveolae and Bin1 form ring-shaped platforms for T-tubule initiation
Source: eLife journal article supplement (doi:10.7554/elife.84139), 2023-04-21
Supplement: fig5-figsupp1-data3 [file Figure 5-figure supplement 1-source data 3. Quantification of caveolae ring diameter in Bin1-exon11 vs Bin1+exon 11.xlsx]

## Sheet: Feuil1
exon11-	exon11+
0.641	0.531
0.55	0.569
1.038	0.439
0.94	0.61
0.55	0.677
0.397	0.694
0.738	0.507
0.641	0.432
0.704	0.701
0.592	0.529
0.592	0.539
0.492	0.594
0.55	0.665
0.704	0.87
0.592	0.671
0.622	0.484
0.778	0.529
0.612	0.585
0.712	0.554
0.824	0.455
0.75	0.407
0.736	0.66
0.803	0.801
0.767	0.984
0.474	0.793
0.648	0.793
0.329	0.946
0.279	0.793
0.294	0.838
0.474	0.793
0.372	0.859
0.4	0.887
0.294	0.641
0.329	0.641
0.421	0.793
0.279	0.641
0.329	0.704
0.354	0.793
0.474	0.641
0.384	0.55
0.441	0.793
0.372	0.622
0.237	0.641
0.561	1.19
0.54	0.793
0.726	0.704
0.441	0.793
0.367	0.946
0.468	0.838
0.481	0.704
0.478	0.793
0.674	0.55
0.627	0.778
0.772	0.907
0.489	0.801
0.812	0.592
0.955	0.838
0.787	1.014
0.731	0.641
0.692	0.859
0.644	0.859
0.666	0.859
0.674	0.859
0.793	0.704
1.1	0.859
0.793	0.793
0.704	0.622
0.738	0.738
0.887	0.641
0.793	0.641
0.984	0.793
1.254	1.083
0.859	0.492
0.838	0.641
1.254	0.55
0.946	0.801
0.709	0.793
0.706	0.946
0.797	0.704
0.677	0.704
0.616	0.641
0.593	0.738
0.55	0.622
0.55	0.704
0.738	0.55
0.55	0.641
0.622	0.641
0.641	0.704
0.793	0.55
0.641	0.696
0.696	0.492
0.492	0.592
0.467	0.696
0.622	0.397
0.55	0.492
0.641	0.738
0.592	0.887
0.696	0.55
0.641	0.55
0.738	0.55
0.55	0.467
0.946	0.696
0.801	0.592
0.603	0.793
0.539	0.704
0.646	0.704
0.536	0.641
0.85	0.55
0.999	0.622
1.19	0.622
1.038	0.641
1.014	0.641
1.089	0.704
1.014	0.467
1.057	0.641
0.87	0.94
0.519	0.738
1.1	0.622
0.704	0.55
0.782	0.592
1.011	0.793
0.787	0.704
0.641	0.887
0.55	0.641
1.014	0.704
0.734	1.014
0.544	0.492
0.818	0.592
0.917	1.1
0.726	0.793
0.785	0.592
0.529	0.738
0.666	0.704
0.363	0.946
0.351	0.887
0.409	0.641
0.493	0.641
0.738	0.887
0.641	0.778
0.55	0.946
0.641	0.641
0.592	1.133
0.738	0.738
0.778	1.038
1.245	0.704
0.704	0.53
0.55	0.658
0.704	0.621
0.641	0.607
0.793	0.501
0.622	0.53
0.704	0.53
0.793	0.566
0.793	0.621
0.704	0.607
0.704	0.744
0.782	0.883
0.679	0.767
0.539	0.474
0.747	0.479
0.477	0.53
0.603	0.482
0.476	0.641
0.688	0.73
0.595	0.559
0.731	0.584
0.528	0.785
0.448	0.452
0.78	0.465
0.623	0.378
0.804	0.446
0.501	0.533
0.67	0.56
0.541	0.427
0.429	0.481
0.411	0.792
0.421	0.563
0.865	0.599
0.51	0.678
0.642	0.714
0.339	0.55
0.385	0.576
0.427	0.354
0.534	0.419
0.704	0.456
0.43	0.401
0.572	0.606
0.649	0.609
0.765	0.38
0.844	0.342
0.574	0.718
0.592	0.574
0.673	0.64
0.77	0.506
0.59	0.591
0.652	0.896
0.638	0.796
0.747	0.805
0.761	0.684
0.665	0.731
0.676	0.725
0.875	0.634
0.705	0.62
0.448	0.659
0.633	0.679
0.694	0.733
0.649	0.484
0.409	0.674
0.681	0.748
0.919	0.732
0.836	0.807
0.618	0.595
0.606	0.585
0.55	0.578
1.035	0.585
0.661	0.763
1.313	0.901
0.541	0.714
0.624	0.892
0.856	0.77
0.573	0.854
0.917	0.64
0.838	0.752
0.676	0.655
0.733	1.064
0.631	0.604
0.856	0.691
0.82	0.531
0.573	0.426
0.601	0.529
0.601	0.59
0.541	0.613
0.676	0.415
0.676	0.558
0.443	0.605
0.75	0.619
0.589	0.646
0.712	0.535
0.75	0.3
0.658	0.673
0.329	0.807
0.362	0.756
0.27	0.895
0.572	0.701
0.354	0.641
0.336	0.526
0.319	0.927
0.16	0.497
0.471	0.774
0.373	0.944
0.259	0.821
0.163	0.671
0.286	0.642
0.371	0.887
0.316	0.397
0.228	0.55
0.265	0.55
0.172	0.397
0.273	0.778
0.211	0.492
0.297	0.467
0.167	0.592
0.322	0.397
0.243	0.55
0.22	0.622
0.175	0.467
0.145	0.55
0.197	0.738
0.195	0.454
0.16	0.467
0.84	0.561
0.565	0.641
0.514	0.492
0.53	0.778
0.709	0.55
0.465	0.397
0.621	0.467
0.543	0.454
0.421	0.492
0.677	0.793
0.53	0.397
0.53	0.641
0.589	0.55
0.421	0.55
1.181	0.397
0.866	0.641
1	0.55
0.772	0.592
0.615	0.55
0.565	0.946
0.491	0.793
0.384	1.1
0.607	0.492
0.501	0.704
0.53	0.738
0.384	1.1
0.474	0.656
0.589	0.542
0.736	0.455
0.566	0.433
0.589	0.535
0.474	0.407
0.589	0.467
0.441	0.43
0.712	0.521
0.688	0.57
0.645	0.493
0.702	0.726
0.481	0.473
0.579	0.62
0.579	0.792
0.763	0.752
0.447	0.45
0.392	0.424
0.478	0.474
0.474	0.635
0.319	0.567
0.444	0.818
0.461	0.488
0.778	0.592
0.704	0.515
0.778	0.519
0.696	0.591
0.704	0.671
0.467	0.484
0.704	1.027
0.793	0.914
1.148	0.906
0.801	0.529
0.859	0.542
0.793	0.508
0.838	0.367
0.738	0.4
0.641	0.655
1.038	0.575
1.169	0.385
0.859	0.908
0.778	0.443
0.704	0.558
0.859	0.401
0.946	0.633
0.887	0.407
0.738	0.571
0.859	0.452
0.669	0.432
0.838	0.676
0.859	0.623
0.704	0.667
0.793	0.579
0.801	0.7
0.987	0.413
0.756	0.327
0.895	0.43
0.883	0.311
0.763	0.359
0.824	0.462
0.712	0.445
0.886	0
0.623
0.697
0.65
0.701
0.418
0.592
0.369
0.302
0.742
0.545
0.752
0.664
0.546
0.524
0.484
0.92
0.956
1.236
0.642
0.679
0.733
0.792
0.49
0.341
0.558
0.987
0.644
0.615
0.402
