# Supplementary material for: Caveolae and Bin1 form ring-shaped platforms for T-tubule initiation
Source: eLife journal article supplement (doi:10.7554/elife.84139), 2023-04-21
Supplement: fig7-data1 [file Figure 7 - source data 1. Quantification of Cav3 protein levels in cultured myotubes treated with siRNA against Cav3.xlsx]

## Sheet: Feuil1
siScr	siCav3
3.38498	1.04651
2.44926	0.925402
1.83665	0.612993
1.08553	0.0842659
0.347008	0.0913841
0.892968	0.145574
