# Supplementary material for: Caveolae and Bin1 form ring-shaped platforms for T-tubule initiation
Source: eLife journal article supplement (doi:10.7554/elife.84139), 2023-04-21
Supplement: fig7-data2 [file Figure 7 - source data 2. Quantification of Bin1GFP fluorescence intensity in cultured control and siCav3 myotubes.xlsx]

## Sheet: Feuil1
siScr	siCav3
8908.83	7612.64
9879.29	7508.04
8528.07	7086.13
11035.5	6896.25
30938	13478.7
25254.2	24352.5
23135.6	10719.8
32376	7596.45
28423.3	8622.87
38864.1	9661.55
22995.7	7492.57
16871	7029.97
31657.2	5189.9
24322.6	5578.09
24713.6	10256.7
30917.5	10086.3
53365.6	14658.8
30378.8	12973.2
16291.1	6343.02
31954.3	6891.91
28009	6293.02
86220.5	5790.72
39425.3	6016.32
45882.1	5814.91
25273.9	5473.54
29572.6	5347.79
29939	5661.48
38983.9	8218.44
34327.9	7037.55
27597	8205.55
27007.6	7768.78
68520.3	5977.09
30222.8	4618.48
20022.5	6477.96
20688.2	8422.66
15198.4	8009.15
24764.4	5428.78
37514.8	5415.88
48313.1	5019.23
28399.2	4927.24
22487.7	6984.82
27944	7130.46
19430.5	6680.31
25017.3	7401.41
75164.7	6381.88
51257.8	10669.8
66473.3	6252.99
69617.3	5937.57
67265.2	8457.27
15972.1	6582.96
14280.1	5542.43
14164.3	4987.25
26223.7	5979.11
77543.9	5351.75
22764.6	10825.5
14199.7	9015.08
22361.1	10563.7
17886.1	8561.3
25301.1	5524.78
14426	5616.35
21054.6	12641.6
22469.9	8618.05
14981.1	5600.48
13260	5004.45
24428.5	5677.25
37612.8	6198.78
17008.5	5485.85
122959	6551.89
162375	9761.68
200718	6865.87
80331.5	7436.56
67275.7	8144.4
107260	7056.86
207875	8330.31
284732	6685.86
68920.4	8154.9
73780.6	8067.5
45534.6	6792.75
	6454.44
	6868.47
	7285.74
	6005.26
	5403.38
	5199.25
	5376.39
	6069.76
	6371.36
	11296.4
	10632.6
	7563.74
	8678.07
	6741.74
	6452.85
	7306.24
	6928.5
	7866.15
	8024.94
	7277.46
	6230.14
	6210.46
	6026.49
	6403.56
	11002
	22930
	12340.4
	7218.4
	7560.43
	7798.65
	6447.57
	9357.81
	6503.67
	5155.14
	5360.94
	12853.3
	10523.6
	10414.5
	12610.8
	5814.35
	5845.28
	20724.5
	12028.6
	12521.9
	5141.98
	19199.5
	18660.9
	7431.01
	7503.06
	7358.25
	14052.9
	14096.9
