# Supplementary material for: Caveolae and Bin1 form ring-shaped platforms for T-tubule initiation
Source: eLife journal article supplement (doi:10.7554/elife.84139), 2023-04-21
Supplement: fig8-data1 [file Figure 8 - source data 1. Quantification of caveolae ring density ctrl vs R26Q vs R26Q +Cav3-GFP.xlsx]

## Sheet: Feuil1
ctrl	R26Q	R26Q+Cav3
0.00637709	0.00092209	0.0107488
0.0078657	0.00561583	0.0163962
0.00407041	0.00791126	0.0149803
0.00829727	0.0056849	0.00743564
0.00678963	0.00553905	0.00415682
0.00808425	0.0116603	0.00382107
0.00867505	0.00394781	0.00455208
0.00950024	0.00215355	0.00717341
0.00322887	0.00493014	0.00675871
0.00749058	0.00314942	0.00375945
0.0127432	0.00321903	0.00679468
0.00568173	0.00326526	0.00606518
0.00860087	0.0062457	0.00442683
0.00899494	0.00109677	0.00485182
0.00968452	0.00505029	0.00412064
	0.00686631	0.0073341
	0.00135453	0.00564941
	0.00232367	0.00564628
	0.00629362	0.005956
