# Supplementary material for: Caveolae and Bin1 form ring-shaped platforms for T-tubule initiation
Source: eLife journal article supplement (doi:10.7554/elife.84139), 2023-04-21
Supplement: fig8-data2 [file Figure 8 - source data 2. Quantification of caveolae ring diameter in ctrl vs R26Q vs R26Q+Cav3-GFP.xlsx]

## Sheet: Feuil1
ctrl	R26Q	R26Q+Cav3
0.49	0.696	0.641
0.58	0.716	0.641
0.666	1.035	0.55
0.435	0.985	0.592
0.55	1.197	0.55
0.628	0.844	0.55
0.628	0.911	0.55
0.628	0.63	0.622
0.628	0.619	0.641
0.723	0.576	0.55
0.742	0.719	0.704
0.712	0.985	0.55
0.623	0.496	0.592
0.597	0.715	0.641
0.673	0.461	0.55
0.601	1.247	0.669
0.712	0.57	0.55
0.592	1.028	0.738
0.676	0.626	0.492
0.755	0.935	0.622
0.446	0.494	0.55
0.712	0.41	0.641
0.776	0.599	0.492
0.755	0.687	0.454
0.631	0.716	0.492
0.778	0.585	0.55
0.855	1.131	0.55
0.78	0.519	0.492
0.61	0.575	0.492
0.65	0.583	0.622
0.755	0.492	0.622
0.872	0.459	0.704
0.55	0.688	0.838
0.656	0.514	0.55
0.836	0.69	0.641
0.545	1.719	0.738
0.674	0.873	0.55
0.856	0.583	0.641
0.712	0.552	0.793
0.649	1.148	0.622
0.624	0.704	0.492
0.756	0.567	0.55
0.58	0.953	0.55
0.65	1.132	0.55
0.558	0.739	0.467
0.624	1.095	0.55
0.597	1.177	0.622
0.501	1.236	0.641
0.812	0.652	0.492
0.692	0.494	0.397
0.575	0.661	0.397
1.38	0.493	0.592
0.796	1.45	0.454
0.696	0.818	0.622
0.611	1.185	0.738
0.825	0.73	0.467
0.825	0.787	0.592
0.55	1.464	0.641
0.603	1.143	0.55
0.765	1.261	0.55
0.701	0.924	0.454
0.604	1.436	0.641
0.77	0.88	0.641
0.544	0.64	0.641
0.58	0.624	0.467
0.755	0.509	0.467
0.665	0.939	0.492
0.633	2.059	0.838
0.491	0.657	0.738
0.536	0.921	0.467
0.515	1.895	0.641
0.702	0.756	0.801
0.661	1.053	0.592
0.653	0.992	0.492
0.756	0.847	0.696
0.685	0.742	0.592
0.987	1.123	0.55
0.624	0.755	0.641
0.784	1.068	0.704
0.72	0.952	0.592
0.531	0.756	0.622
0.606	0.545	0.467
0.584	0.704	0.704
0.474	0.836	0.778
0.646	0.78	0.793
0.797	0.55	0.622
0.451	1.185	0.641
0.434	0.525	0.55
0.564	1.762	0.838
0.529	1.052	0.801
0.514	0.978	0.793
0.427	1.04	0.641
0.486	0.818	0.55
0.661	0.525	0.641
0.631	0.809	0.622
0.498	0.987	0.704
0.418	0.546	0.592
0.558	0.703	0.55
0.894	0.652	0.641
0.56	0.512	0.492
0.492	0.665	0.55
0.531	0.961	0.641
0.487	0.937	0.55
0.566	0.56	0.622
0.715	1.054	0.696
0.636	0.787	0.55
0.511	0.591	0.55
0.575	0.568	0.704
0.536	0.578	0.738
0.618	0.604	0.801
0.655	0.628	0.641
0.583	0.813	0.704
0.475	0.632	0.55
0.515	1.188	0.622
0.657	0.669	0.454
0.458	1.317	0.467
0.731	0.74	0.622
0.48	0.652	0.641
0.45	0.606	0.696
0.511	0.712	0.838
0.492	0.58	0.641
0.501	0.583	0.641
0.673	0.615	0.55
0.52	0.727	0.55
0.416	0.827	0.592
0.399	0.82	1.083
0.565	0.418	0.641
0.524	0.552	0.641
0.397	0.396	0.704
0.59	0.856	0.793
0.443	1.209	0.738
0.681	1.354	0.738
0.566	0.9	0.467
0.416	0.986	0.454
0.549	0.474	0.55
0.537	0.672	0.55
0.484	1.29	1.19
0.492	0.819	0.622
0.494	2.739	0.561
0.371	0.587	0.55
0.437	0.517	0.55
0.359	0.489	0.622
0.493	0.689	0.622
0.574	0.563	0.55
0.45	0.649	0.641
0.418	0.986	0.622
0.392	0.701	0.778
0.46	1.129	0.492
0.464	1.402	0.561
0.82	0.879	0.622
0.656	0.626	0.55
0.794	0.69	0.492
0.426	0.654	0.467
0.654	0.71	0.467
0.697	0.603	0.467
0.542	0.603	0.492
0.453	0.475	0.492
0.526	0.64	0.492
0.692	0.73	0.492
0.413	0.861	0.492
0.578	0.703	0.492
0.584	0.731	0.492
0.784	0.611	0.592
0.78	0.502	0.669
0.583	0.652	0.492
0.606	0.588	0.561
0.481	0.611	0.467
0.679	0.592	0.55
0.562	0.507	0.592
0.465	0.704	0.55
0.451	0.679	0.55
0.658	0.764	0.492
0.71	1.154	0.641
0.641	0.494	0.704
0.614	0.95	0.738
0.42	0.671	0.561
0.461	0.887	0.622
0.567	0.506	0.778
0.907	0.931	0.55
0.591	0.922	0.704
0.561	0.779	0.55
0.694	1.044	0.641
0.421	0.648	0.622
0.614	0.735	0.492
0.457	0.694	0.55
0.778	0.552	0.704
0.812	0.544	0.492
0.564	1.354	0.311
0.815	0.595	0.592
0.742	0.631	0.592
0.484	0.546	0.641
0.633	0.529	0.55
0.737	0.601	0.55
0.631	0.64	0.778
0.528	0.958	0.467
0.556	0.922	0.55
0.594	0.799	0.55
0.618	0.915	0.467
0.513	0.371	0.838
0.48	0.775	0.397
0.521	0.493	0.492
0.412	0.708	0.55
0.654	0.932	0.704
0.535	0.646	0.55
0.72	0.685	0.793
0.557	0.924	0.641
0.729	0.961	0.793
0.451	0.64	0.778
0.49	0.6	1.254
0.488	0.43	0.887
0.471	0.838	0.859
0.445	0.702	0.838
0.388	0.549	0.793
0.74	0.481	0.704
0.61	0.668	0.704
0.575	0.4	0.738
0.46	0.904	0.55
0.642	0.518	0.641
0.493	1.383	0.622
0.539		0.738
0.529		0.704
0.463		0.738
0.545		0.738
0.574		0.838
0.517		0.622
0.49		0.984
0.603		0.641
0.453		0.704
0.548		0.55
0.371		0.641
0.432		0.793
0.47		0.641
0.658		0.738
0.603		1.014
0.905		0.704
0.722		0.641
0.707		0.704
0.736		0.738
0.473		1.19
0.435		0.704
0.507		1.083
0.557		0.641
0.738		0.704
0.728		0.592
0.49		0.641
0.65		0.801
0.786		0.704
0.671		0.397
0.496		0.838
0.623		1.133
0.77		0.738
0.572		0.793
0.467		0.801
0.725		0.738
0.613		0.704
0.722		0.887
0.611		1.122
0.792		0.592
0.47		0.641
0.585		0.641
0.627		0.641
0.603		0.592
0.911		0.622
0.484		0.55
0.636		0.561
0.627		0.704
0.58		0.55
0.61		0.738
0.667		0.622
0.467		0.696
0.616		1.038
0.623		0.492
0.585		0.55
0.629		0.55
0.654		0.704
0.455		0.622
0.439		0.454
0.385		0.55
0.486		0.793
0.402		0.793
0.644		0.55
0.467		0.397
0.437		0.984
0.646		0.738
1.163		0.492
0.948		0.397
1.17		0.641
0.602		0.592
0.58		0.492
0.618		0.55
0.766		0.641
0.727		0.704
0.698		0.704
1.007		0.946
1.143		1.014
0.804		0.492
1.053		0.793
0.906		0.592
0.876		0.492
1.073		0.622
0.73		0.641
0.889		1.089
0.771		0.738
0.742		0.55
1.04		0.492
0.909		0.696
0.959		0.704
0.87		0.55
0.543		0.492
0.528		0.704
		0.397
		0.778
		0.622
		0.55
		0.55
		0.641
		0.641
		0.622
		0.622
		0.55
		0.641
		0.696
		0.887
		0.641
		0.887
		0.55
		0.801
		0.704
		0.704
		0.793
		0.704
		0.704
		0.622
		0.592
		0.738
		0.696
		0.622
		0.622
		0.696
		0.55
		0.467
		0.492
		0.801
		0.592
		0.622
		0.696
		0.592
		0.838
		0.622
		0.492
		0.738
		0.641
		0.887
		0.55
		0.492
		0.704
		0.704
		0.397
		0.397
		0.467
		0.592
		0.55
		1.014
		0.696
		0.778
		0.704
		0.984
		0.704
		0.738
		0.946
		0.838
		0.859
		1.014
		0.887
		0.887
		0.641
		1.014
		0.801
		0.704
		0.859
		1.038
		0.641
		0.641
		1.044
		0.793
		0.984
		0.946
		0.801
		0.793
		1.014
		0.793
		0.887
		0.622
		0.778
		0.801
		0.778
		0.793
		0.838
		0.704
		0.778
		0.793
		0.641
		1.254
		1.185
		1.378
		0.887
		0.793
		0.793
		1.014
		0.738
		0.738
		0.793
		0.641
		0.793
		0.984
		0.793
		0.801
		0.622
		0.907
		0.859
		0.467
		0.55
		0.561
		0.492
		0.492
		0.55
		0.55
		0.933
		0.887
		0.793
		0.704
		0.793
		0.984
		0.94
		0.838
		0.641
		0.793
		0.887
		0.738
		0.704
		0.704
		0.592
		0.641
		0.55
		0.55
		0.622
		0.55
		0.704
		0.696
		0.55
		0.492
		0.622
		0.859
		0.55
		0.641
		0.859
		0.738
		0.622
		0.641
		0.838
		0.984
		0.622
		0.397
		0.55
		0.55
		0.55
		0.859
		0.622
		0.641
		0.641
		0.622
		0.467
		0.704
		0.94
		0.55
		0.704
		1.245
		0.738
		0.838
		0.801
		0.838
		0.778
		0.704
		0.738
		0.704
		0.778
		0.887
		0.704
		0.793
		0.738
		0.696
		0.704
		0.704
		0.622
		0.946
		0.946
		0.793
		0.859
		0.793
		0.793
		0.704
		0.704
		0.696
		0.738
		0.801
		0.801
		1.014
		0.838
		0.704
		1.1
		0.984
		0.793
		0.838
		0.859
		0.793
		0.793
		0.946
		0.933
		0.859
		1.038
		0.738
		0.793
		1.133
		0.738
		0.641
		0.738
		0.704
		0.94
		0.778
		0.887
		0.738
		0.793
		0.907
		0.838
		0.622
		0.622
		0.859
		0.838
		0.704
		0.778
		0.859
		0.592
		0.55
		0.704
		0.641
		0.641
		0.738
		0.55
		0.704
		0.622
		0.641
		0.696
		0.793
		0.592
		0.622
		0.778
		0.641
		0.704
		0.859
		0.738
		0.641
		0.738
		0.704
		0.55
		0.704
		0.641
		1.038
		0.704
		0.704
		0.641
		0.641
		0.738
		0.704
		0.696
		0.838
		0.793
		0.859
		0.793
		0.887
		1.038
		0.793
		0.793
		1.23
		0.641
		0.859
		1.038
		0.984
		0.946
		0.641
		0.946
		1.014
		0.859
		1.1
		1.014
		1.014
		0.793
		0.984
		1.23
		0.859
		0.793
		0.704
		0.704
		0.622
		0.622
		0.793
		0.641
		0.55
		0.492
		0.704
		0.704
		0.946
		1.1
		0.641
		0.696
		0.859
		0.704
		0.55
		0.622
		0.641
		0.696
		0.696
		0.946
		0.467
		0.454
		0.641
		0.704
		0.592
		0.704
		0.704
		0.55
		0.641
		0.641
		0.704
		0.622
		0.592
		0.696
		0.907
		0.778
		0.946
		0.641
		0.738
		0.907
		0.704
		0.55
		0.704
		0.492
		0.641
		0.592
		0.641
		0.793
		0.793
		0.592
		0.793
		0.696
		0.793
		0.696
		0.933
		0.94
		0.793
		0.704
		0.704
		0.907
		0.793
		0.641
		0.641
		0.933
		0.622
		0.622
		0.641
		0.492
