# Supplementary material for: Caveolae and Bin1 form ring-shaped platforms for T-tubule initiation
Source: eLife journal article supplement (doi:10.7554/elife.84139), 2023-04-21
Supplement: fig8-data3 [file Figure 8 - source data 3. Quantification of Bin1GFP intensity in control and patient myotubes transduced with Bin1.xlsx]

## Sheet: Feuil1
CTRL	Cav6201
163246	33451
135404	16295
45725.1	20125.7
30691	43953.5
23292.7	21469.7
26135.4	7653.07
18044	13279.5
19277.8	10623.8
25293.8	11185.5
29128.4	10177.7
	13349.1
	9727.7
	20092.4
	21390.2
	13895.8
	11967.9
	7116.29
	17603
	19498.7
	17549.3
	10619.4
	9121.84
	12081.4
	92797.8
