# Supplementary material for: Caveolae and Bin1 form ring-shaped platforms for T-tubule initiation
Source: eLife journal article supplement (doi:10.7554/elife.84139), 2023-04-21
Supplement: fig8-data4 [file Figure 8 - source data 4. Quantification of tubule density in control and patient myotubes transduced with Bin1+exon11.xlsx]

## Sheet: Feuil1
CTRL+ex11	R26Q+ex11
0.0115038	0.0038593
0.0083415	0.00110548
0.00707467	0.000584294
0.0107236	0.0081207
0.011919	0.00257481
0.00430898	0.00123511
0.00857588	0.000477235
0.00340665	0.00128125
0.00631995	0.00116133
0.00418933	0.00249046
0.00414346	0.00333319
0.00415554	0.00229868
0.00356176	0.00160702
0.00407639	0.00248756
0.00662604	0.000214444
0.00586078	0.00120548
0.00741854	0.000252049
0.00330792	0.000870035
0.00463511	0.00120963
0.00409454	0.0030715
0.0112228	0.0027847
0.00774461	0.00073345
0.00753907	0.00490377
0.010506	0.0178315
0.00689291	0.00498361
	0.0140859
	0.00612447
	0.00451349
	0.0168855
	0.0176084
