# Supplementary material for: Caveolae and Bin1 form ring-shaped platforms for T-tubule initiation
Source: eLife journal article supplement (doi:10.7554/elife.84139), 2023-04-21
Supplement: fig8-figsupp1-data1 [file Figure 8 - figure supplement 1- source data 1. Densitometric quantification of Cav3 protein levels in patient myotubes.xlsx]

## Sheet: Feuil1
AB1079	cav69	Cav6201	650
7.76539	1.8131	0.158017	0.588682
8.48617	2.70721	0.0616379	0.258188
		1.20466	1.2398
