# Supplementary material for: Caveolae and Bin1 form ring-shaped platforms for T-tubule initiation
Source: eLife journal article supplement (doi:10.7554/elife.84139), 2023-04-21
Supplement: figures [file elife-84139-figures-v2.pdf]

---

## Figures and figure supplements

Caveolae and Bin1 form ring-shaped platforms for T-tubule initiation

**Eline Lemerle et al.**

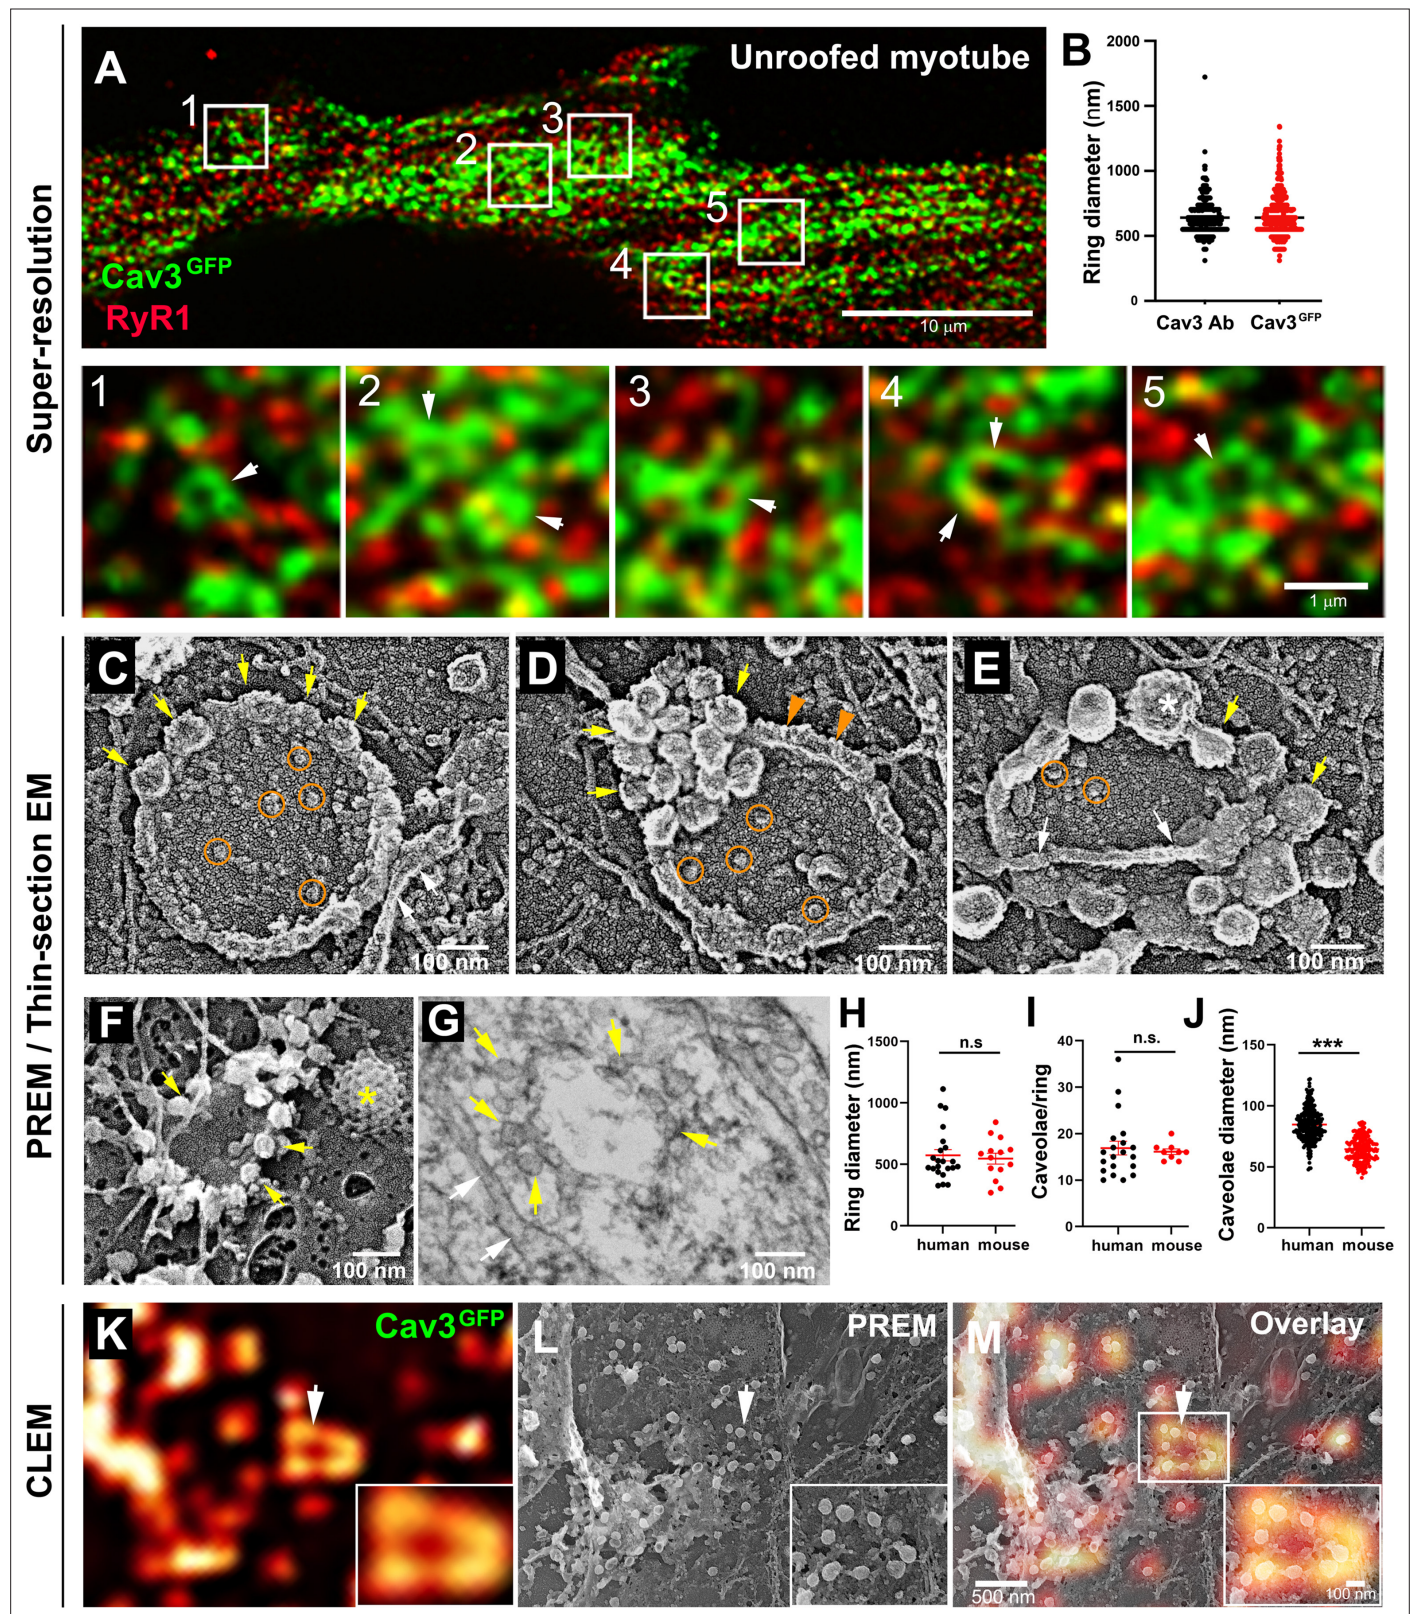

**Figure 1.** Cav3-positive caveolae form nanoscale rings in differentiated myotubes. **(A)** Super-resolution images of a human myotube expressing Cav3<sup>GFP</sup> and labelled with antibodies against RyR1 (red). **(B)** Quantification of ring diameter from super-resolution images of differentiated myotubes either expressing Cav3<sup>GFP</sup> or labelled with antibodies against Cav3 (Cav3Ab, n=21 myotubes from three independent experiments; Cav3<sup>GFP</sup>, n=14 myotubes from three independent experiments; p=0.081). **(C-E)** Gallery of PREM images of rings in unroofed human myotubes. Yellow arrows indicate individual caveolae. **(F-G)** Gallery of PREM images of rings in unroofed human myotubes. Yellow arrows indicate individual caveolae. **(H)** Ring diameter (nm) for human (black) and mouse (red). n.s. = not significant. **(I)** Caveolae/ring for human (black) and mouse (red). n.s. = not significant. **(J)** Caveolae diameter (nm) for human (black) and mouse (red). \*\*\* = p < 0.001. **(K-M)** CLEM images of a ring. Scale bar: 100 nm. **(L)** PREM image of a ring. Scale bar: 500 nm.

Figure 1 continued on next page



*Figure 1 continued*

caveolae found on caveolae rings, white arrows denote cortical ER/SR cisternae and orange circles denote protein particles present inside the ring. **(F)** High magnification view of a ring formed by groups of caveolae in unroofed mouse primary myotubes. Yellow arrows denote caveolae. The yellow asterisk indicates a clathrin-coated pit. **(G)** High-magnification view of a ring formed by caveolae in unroofed mouse primary myotubes observed on thin-sections. Yellow arrows indicate groups of caveolae with a circular organization and white arrows denote cortical ER/SR. **(H)** Quantification of ring diameters from human and mouse myotubes on PREM images (human,  $n=22$  images from four independent experiments; mouse,  $n=14$  images from five independent experiments;  $p=0.67$ ). **(I)** Quantification of the number of caveolae composing a ring from differentiated myotubes (human,  $n=20$ ; mouse,  $n=9$ ;  $p=0.63$ ). **(J)** Quantification of the average caveolae diameter from differentiated mouse or human myotubes (human, 439 caveolae from  $n=15$  images; mouse, 187 caveolae from  $n=12$  images;  $p<0.0001$ ). Quantification was performed from at least three independent experiments. **(K–M)** CLEM images combining Cav3<sup>GFP</sup> super-resolution microscopy with PREM of the same human myotube. **(K)** Cav3<sup>GFP</sup> fluorescence. **(L)** Same area imaged with TEM. **(M)** CLEM overlay. White arrow indicates a group of caveolae with a circular organization.

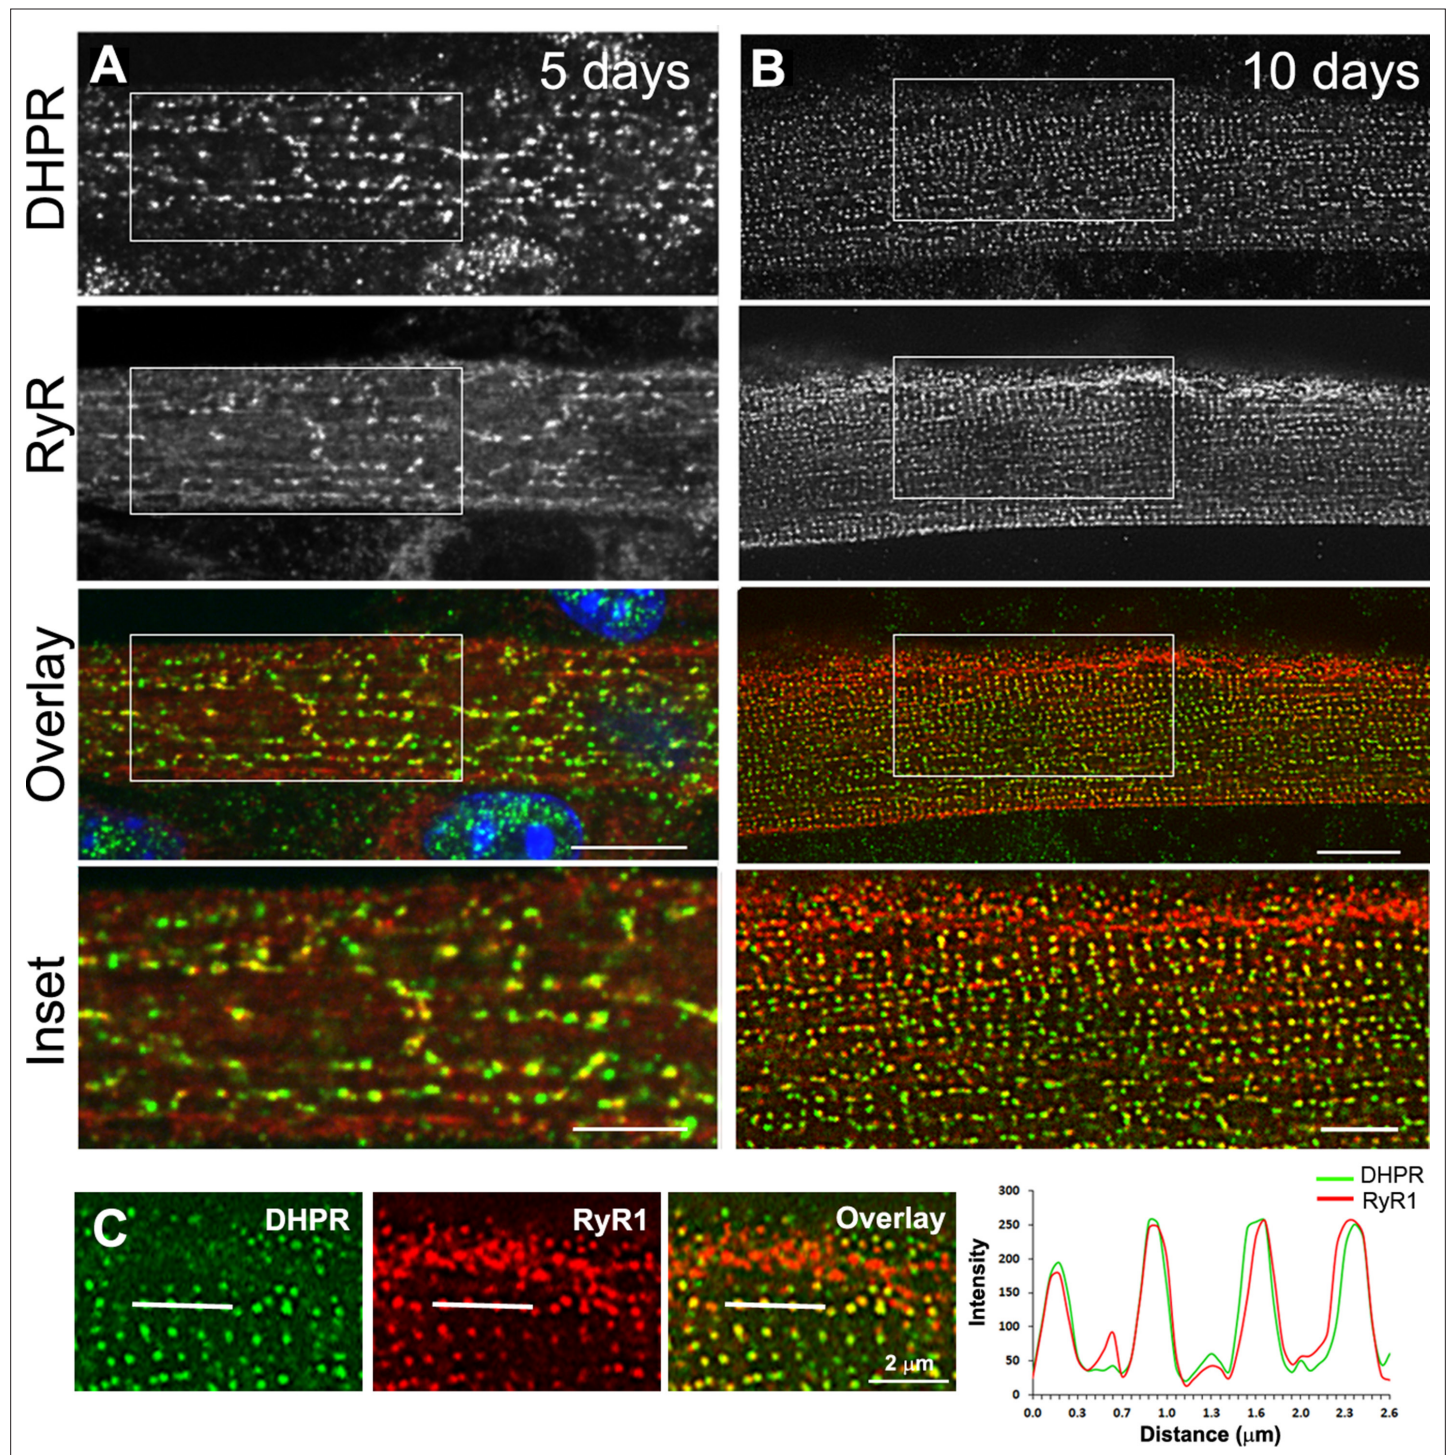

**Figure 1—figure supplement 1.** Triad markers are organized longitudinally and then transversally during in vitro differentiation of myotubes into myofibers. **(A)** Immunofluorescent DHPR (green) and Ryanodine receptor (RyR1) (red) labeling in primary mouse myotubes differentiated for 5 days. Labeling shows clusters of RyR1 and DHPR that appear longitudinal. **(B)** Immunofluorescent labeling of DHPR (green) and RyR1 (red) in murine primary myotubes extensively differentiated for 10 days appears as double rows of dots. Scale bar: 10  $\mu\text{m}$  and 5  $\mu\text{m}$  for insets. **(C)** Line scan of indicated regions in the left panel showing average intensity for DHPR (green) and RyR1 (red) labeling in primary mouse myotubes differentiated for 10 days.



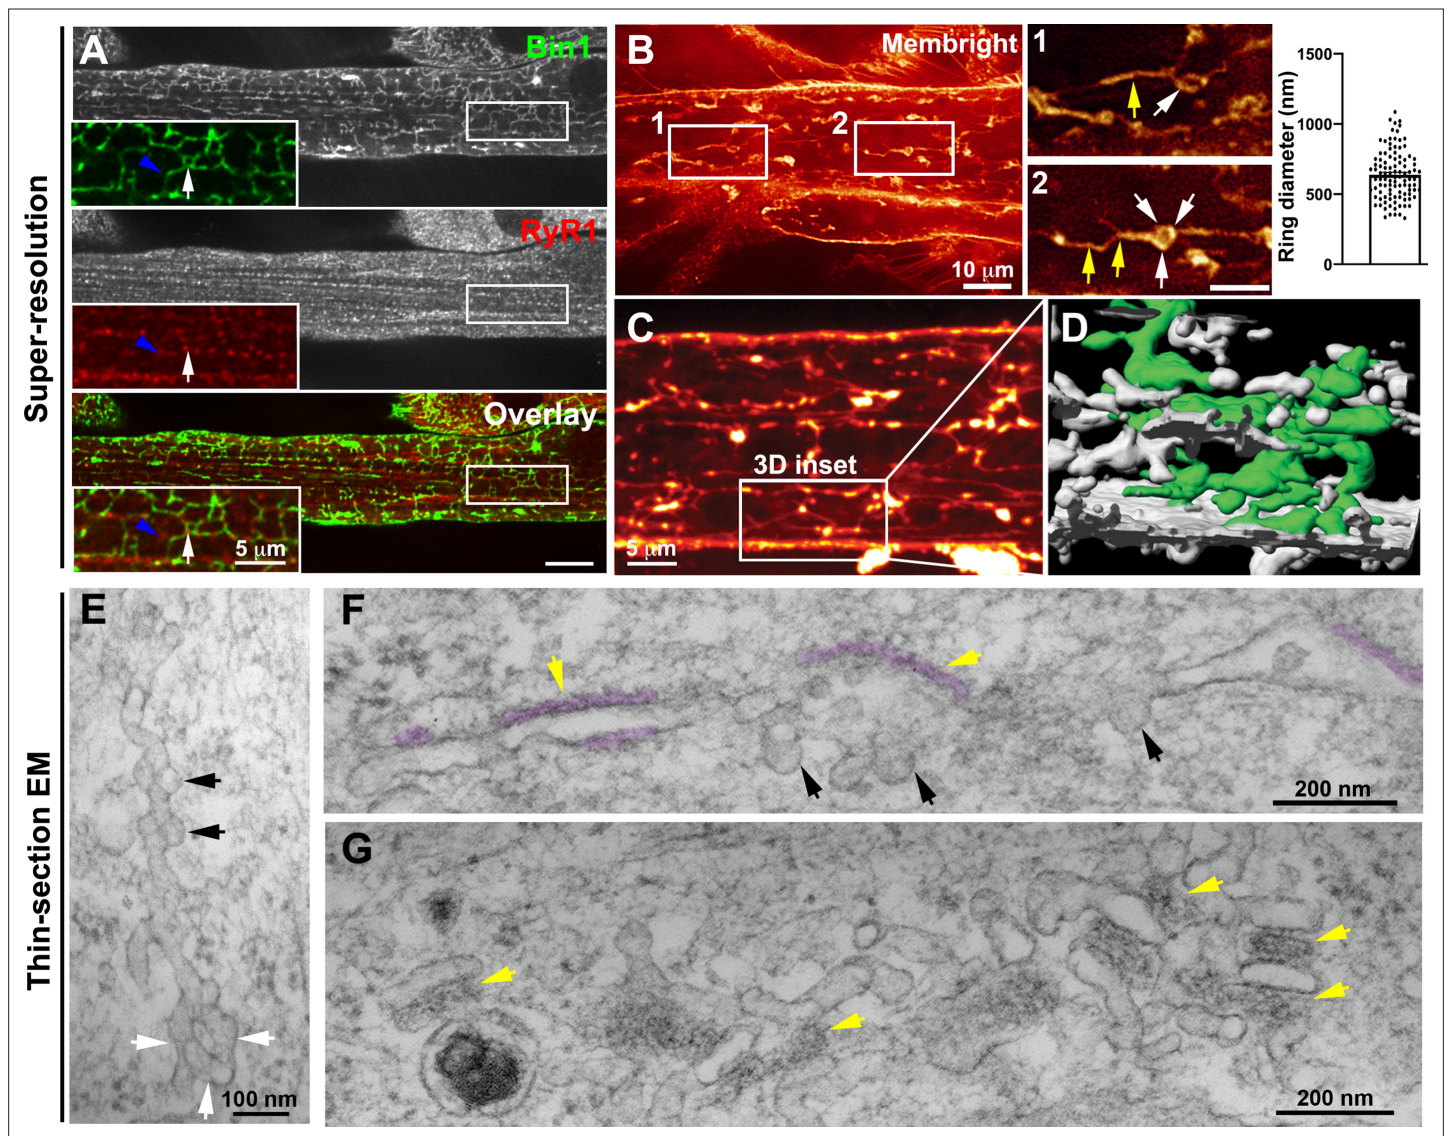

**Figure 1—figure supplement 2.** Nascent T-tubules form ring-like structures in myotubes. (A) Bin1 antibody labels a tubular network extending from the plasma membrane forming contacts with RyR1-positive fluorescent dots. Blue arrowheads and white arrows denote tubular and circular Bin1 structures respectively. (B) T-tubule labeling with MemBright lipid probe using short (10 min) pulses on live myotubes. Tubules emanate transversely from the sarcolemma and are organized longitudinally along the length of the myotube. Note the presence of ring-like structures (white arrows) in continuity with the tubular structures (yellow arrows). Quantification of ring diameter is shown on the right panel. The average ring labeled by MemBright was  $667 \pm 286$  nm in diameter. (C–D) 3D reconstruction of the myotube region in (C) labeled with the MemBright lipid probe. One of the tubules is colored green from the plasma membrane for better visualization. (E–G) High-magnification views of nascent tubules observed by thin-section EM. (E) Characteristic pearled appearance with presence of 60–70 nm bumps similar to caveolae protruding from the tubule and denoted by black arrows. White arrows denote the ring at the base of the tubule. (F) and (G) SR/T-tubule junctions are denoted by yellow arrows and pseudo-colored purple in F. The tubules can form close junctions with SR cisternae recognizable by their characteristic electron density (pseudocolored in purple) (Franzini-Armstrong, 2018; Lainé et al., 2018) only in regions of the tube that do not contain caveolae.



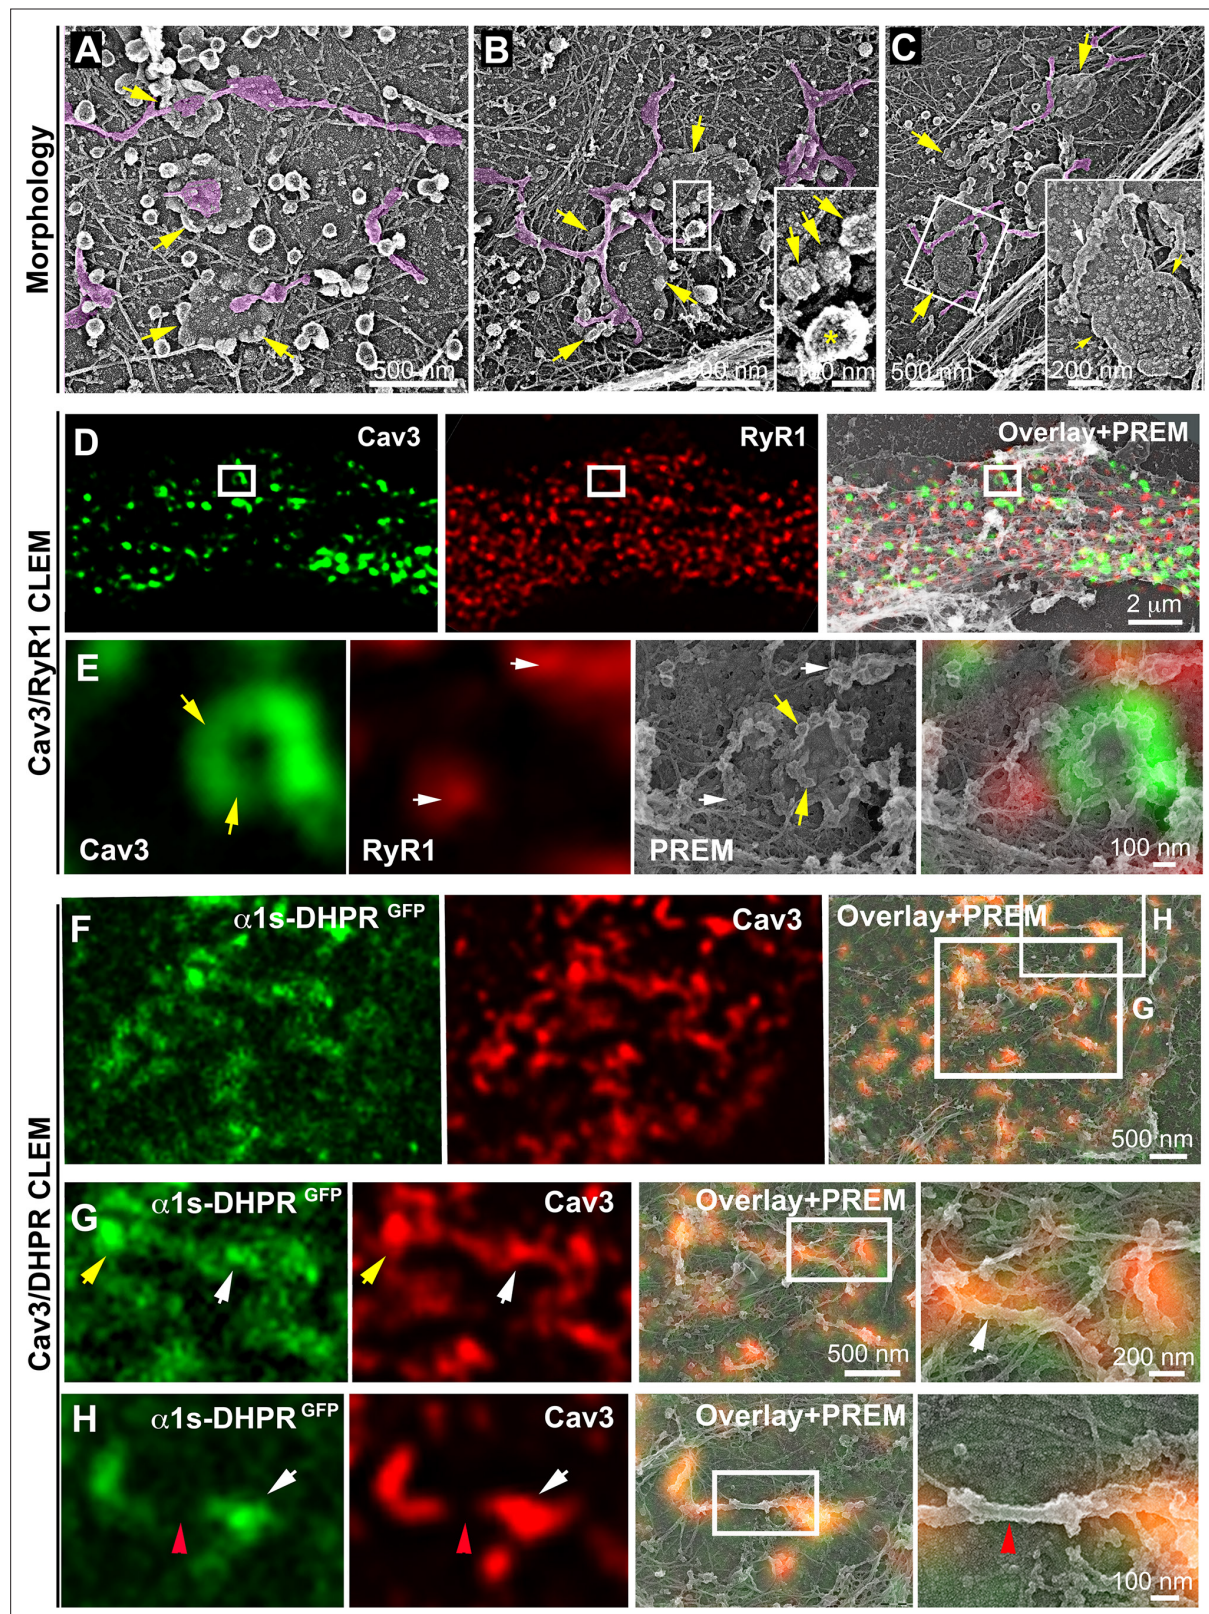

**Figure 2.** DHPR is enriched in Cav3 structures in contact with RyR1-positive SR cisternae. (A–C) EM images showing caveolae rings in contact with cortical endo/sarcoplasmic reticulum cisternae (pseudo-colored purple) on the cytosolic part of the adherent sarcolemma. Yellow arrows indicate caveolae rings. Caveolae rings are formed by caveolae still presenting their characteristic coat indicated by yellow arrows in B inset (yellow asterisk indicates a clathrin-coated pit). White arrows indicate endo/sarcoplasmic reticulum cisternae going over the caveolae ring. (D–E) Correlative microscopy

Figure 2 continued on next page



*Figure 2 continued*

of Cav3 (green) and RyR1 (red) labeling on myotubes. **(E)** Enlargement of the inset in **(D)**. Yellow arrows indicate caveolae rings. White arrows indicate cortical endo/sarcoplasmic reticulum cisternae. **(F–H)** Correlative microscopy of the  $\alpha 1$ s-subunit of DHPR fused to GFP (green) and Cav3 (red) labeling on myotubes. Yellow arrows indicate a caveolae ring. White arrows indicate tubules where Cav3 and DHPR colocalize. Red arrowheads indicate a region of the tubule free of Cav3 and  $\alpha 1$ s labeling and lacking caveolar material at the ultrastructural level.

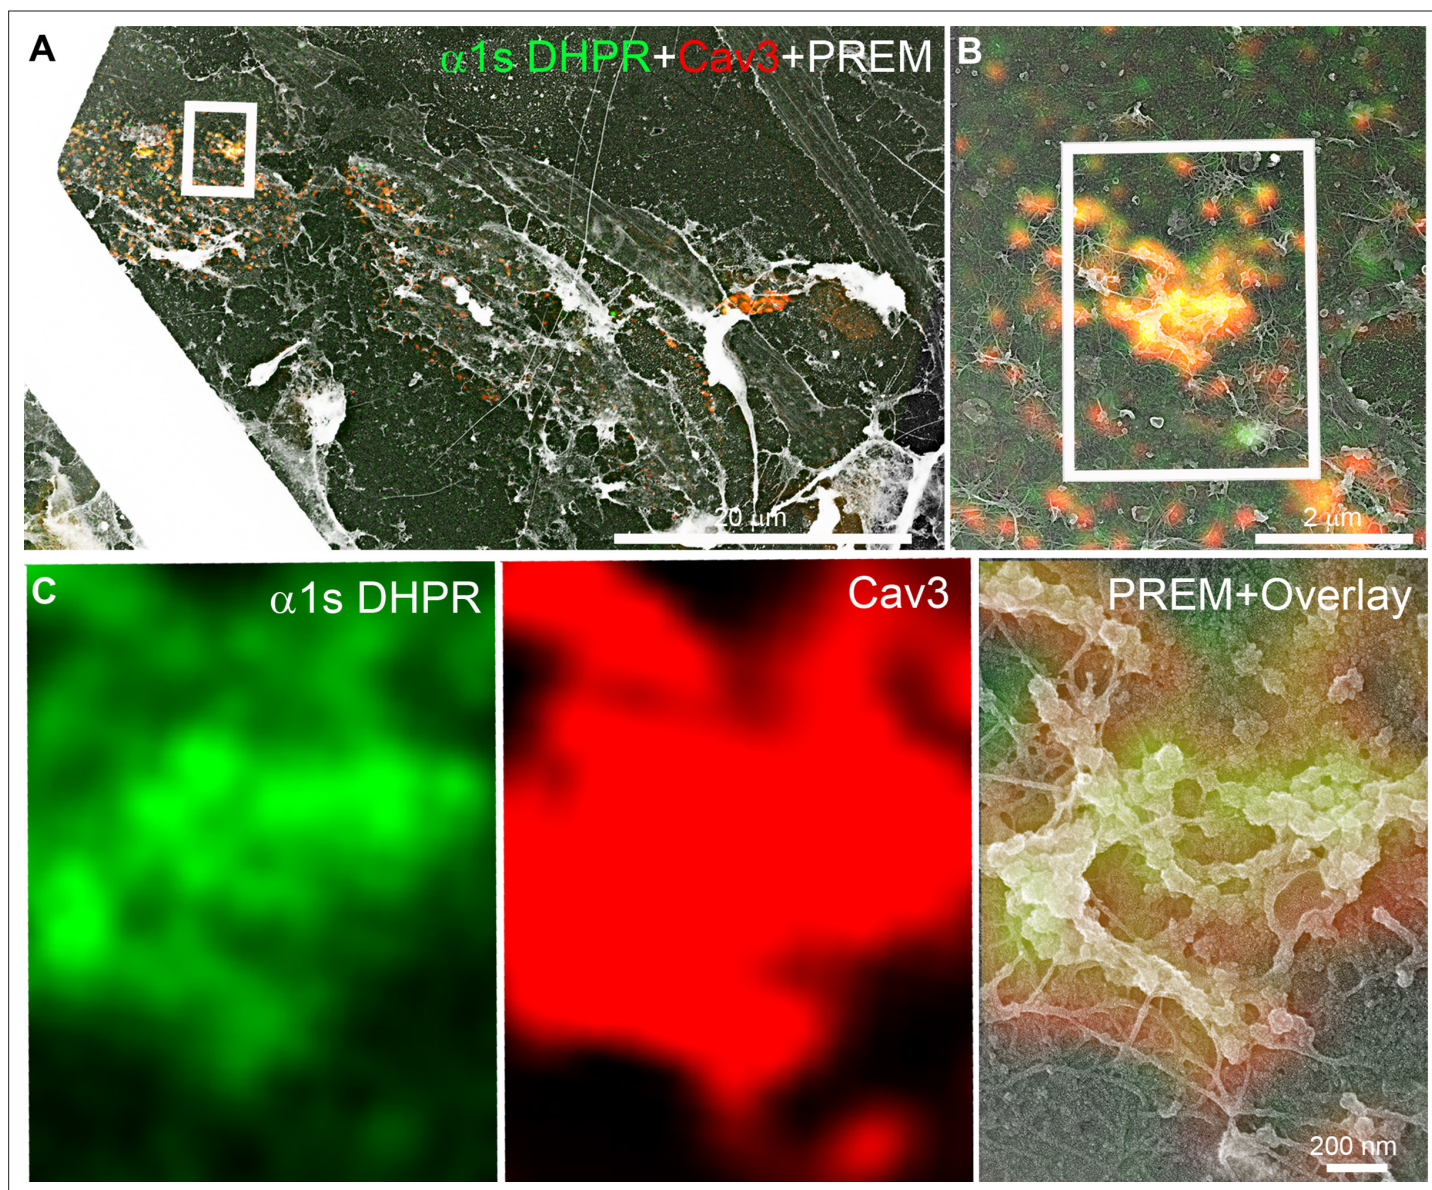

**Figure 2—figure supplement 1.** Additional CLEM of DHPR in caveolin-positive ring-like structures. (A–C) Two-color CLEM analysis in unroofed primary mouse myotubes transduced with GFP-tagged  $\alpha 1s$ -subunit of the DHPR (green) and labeled with antibodies against Cav3 (red). (C) Higher magnification view of the inset in (B). DHPR and Cav3 labeling colocalize on circular structures and pearled tubes at the plasma membrane.



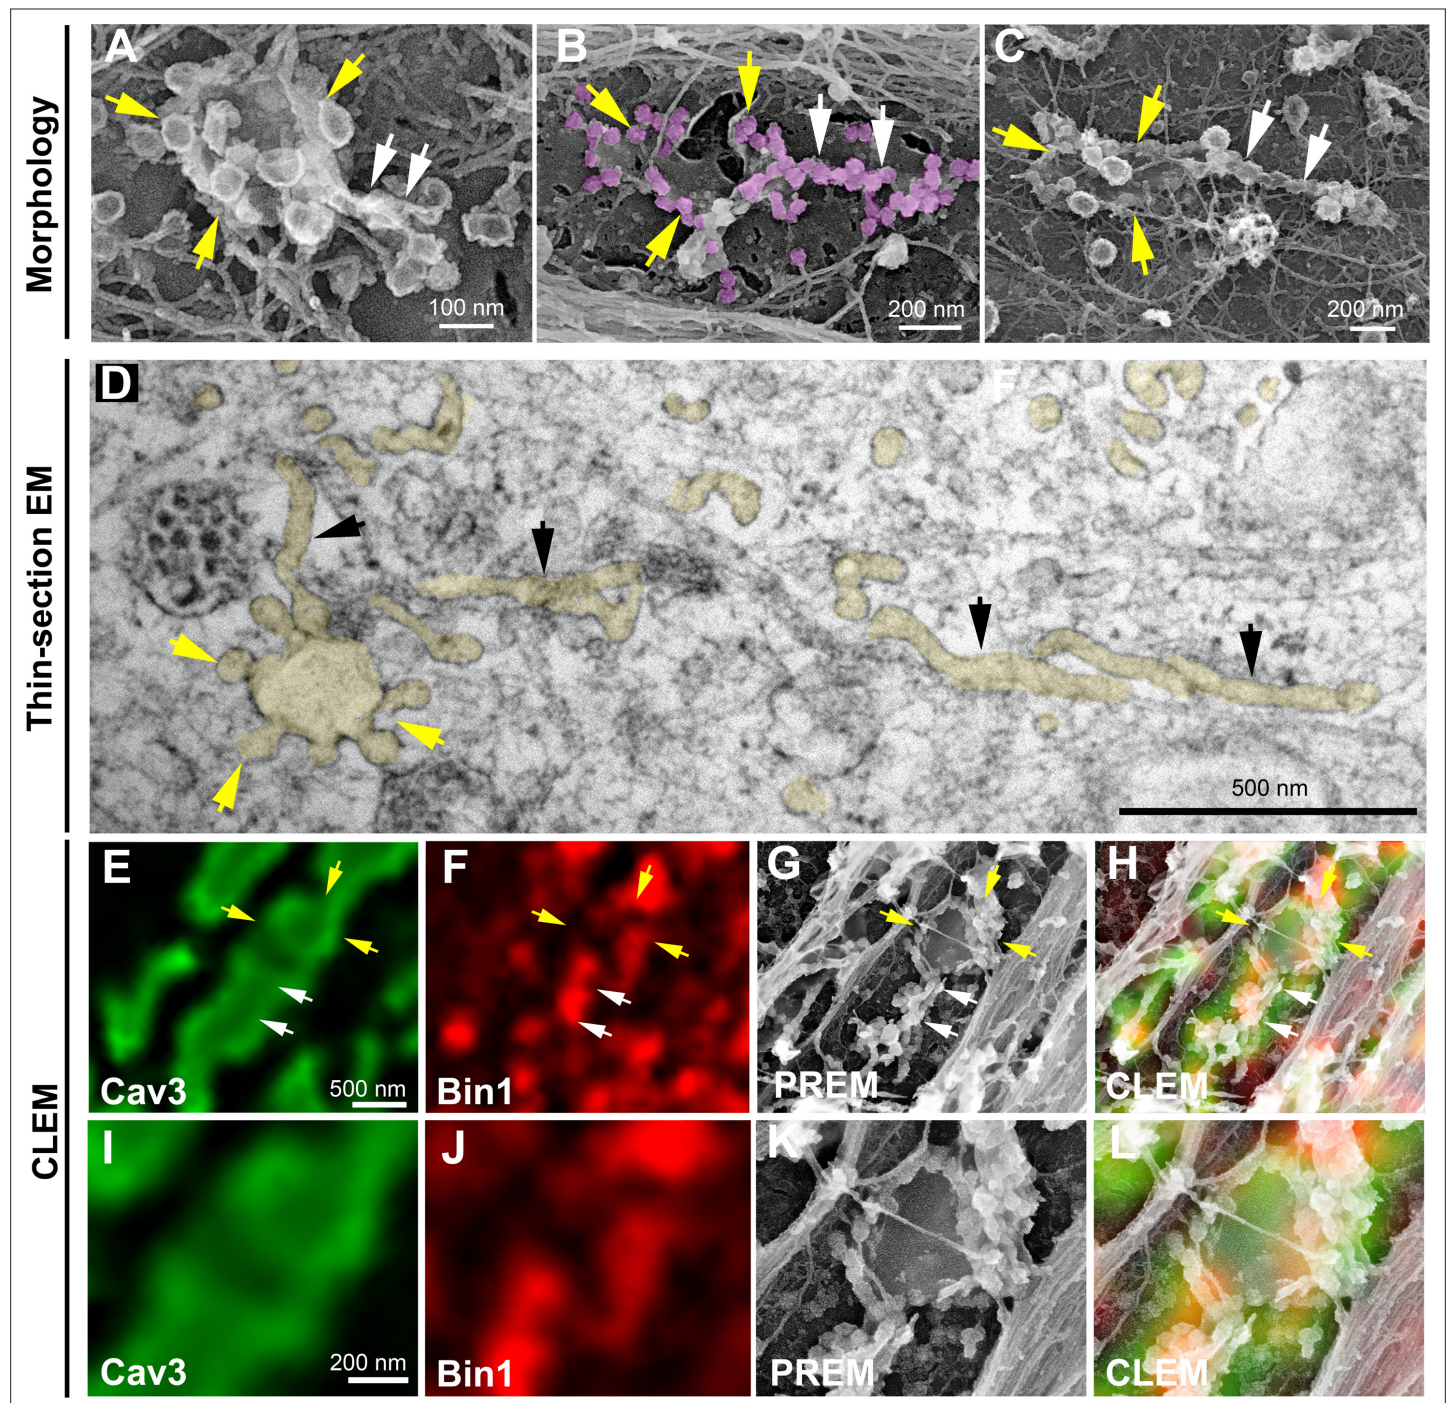

**Figure 3.** Caveolae rings extend into Bin1-positive tubules. (A–C) High magnification PREM views of caveolae rings on unroofed myotubes from primary mouse cultures. In (B) caveolae are pseudo-colored in light purple. White arrows indicate beaded tubes emanating from structures formed by ring caveolae and yellow arrows indicate the caveolae ring. (D) High magnification view of several tubules (black arrows) protruding from a single caveolae ring (yellow arrows) observed on conventional thin-section EM. The caveolae ring and tubules are pseudo-colored pale yellow. (E–L) Correlative microscopy of Cav3 (green) and Bin1 (red) immunolabeling on an unroofed 9 day extensively differentiated murine myotube. In (E–H), white arrows indicate tubules emanating from Bin1 and Cav3 labeled rings and yellow arrows indicate the ring formed by caveolae. (I–L) Higher magnification CLEM view of the ring structure labeled with Cav3 (green) and Bin1 (red) antibodies.



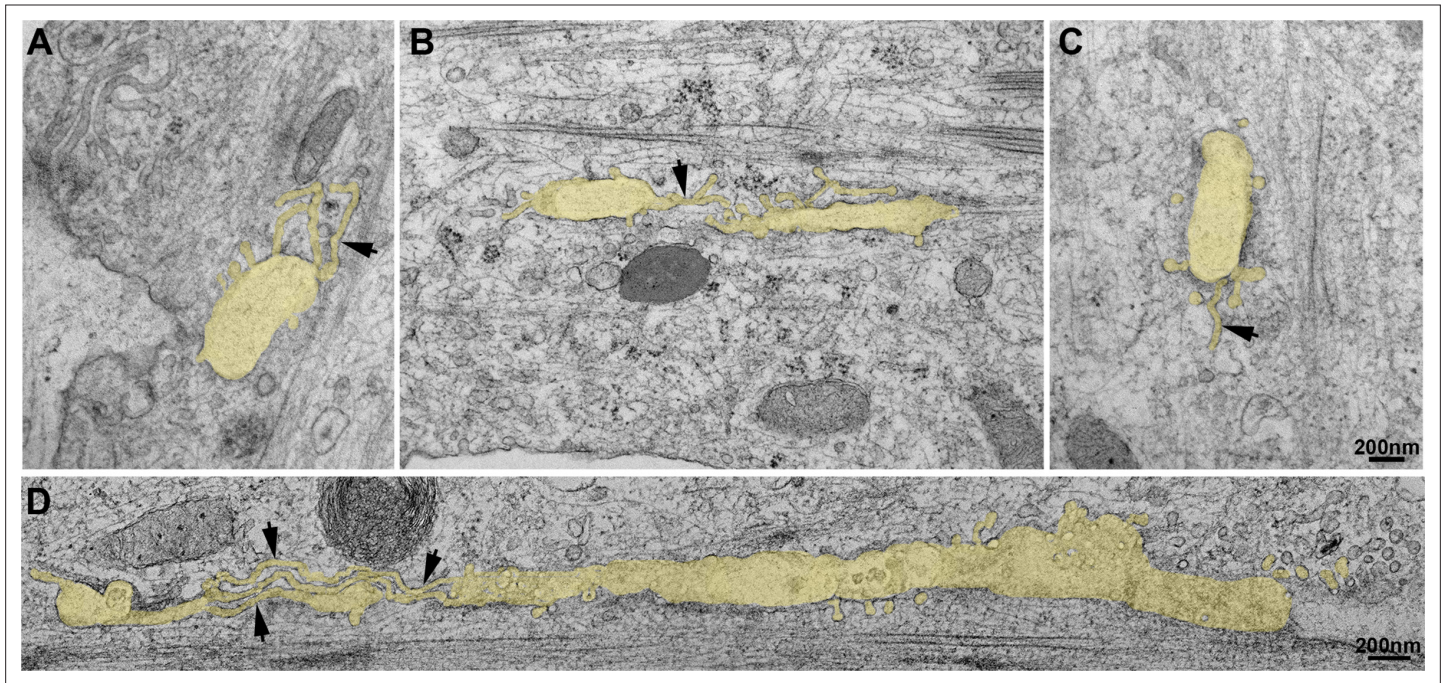

**Figure 3—figure supplement 1.** Thin-section EM analysis of extensively differentiated myotubes. (A–D) Gallery of thin-section EM from the adherent surface of extensively differentiated mouse primary myotubes as in **Figure 3D**. The tubular structures emanating from the caveolae ring-like structures are pseudocolored in pale yellow. Tubules emanating from the circular structures measure 25 nm in diameter and are denoted with black arrows.



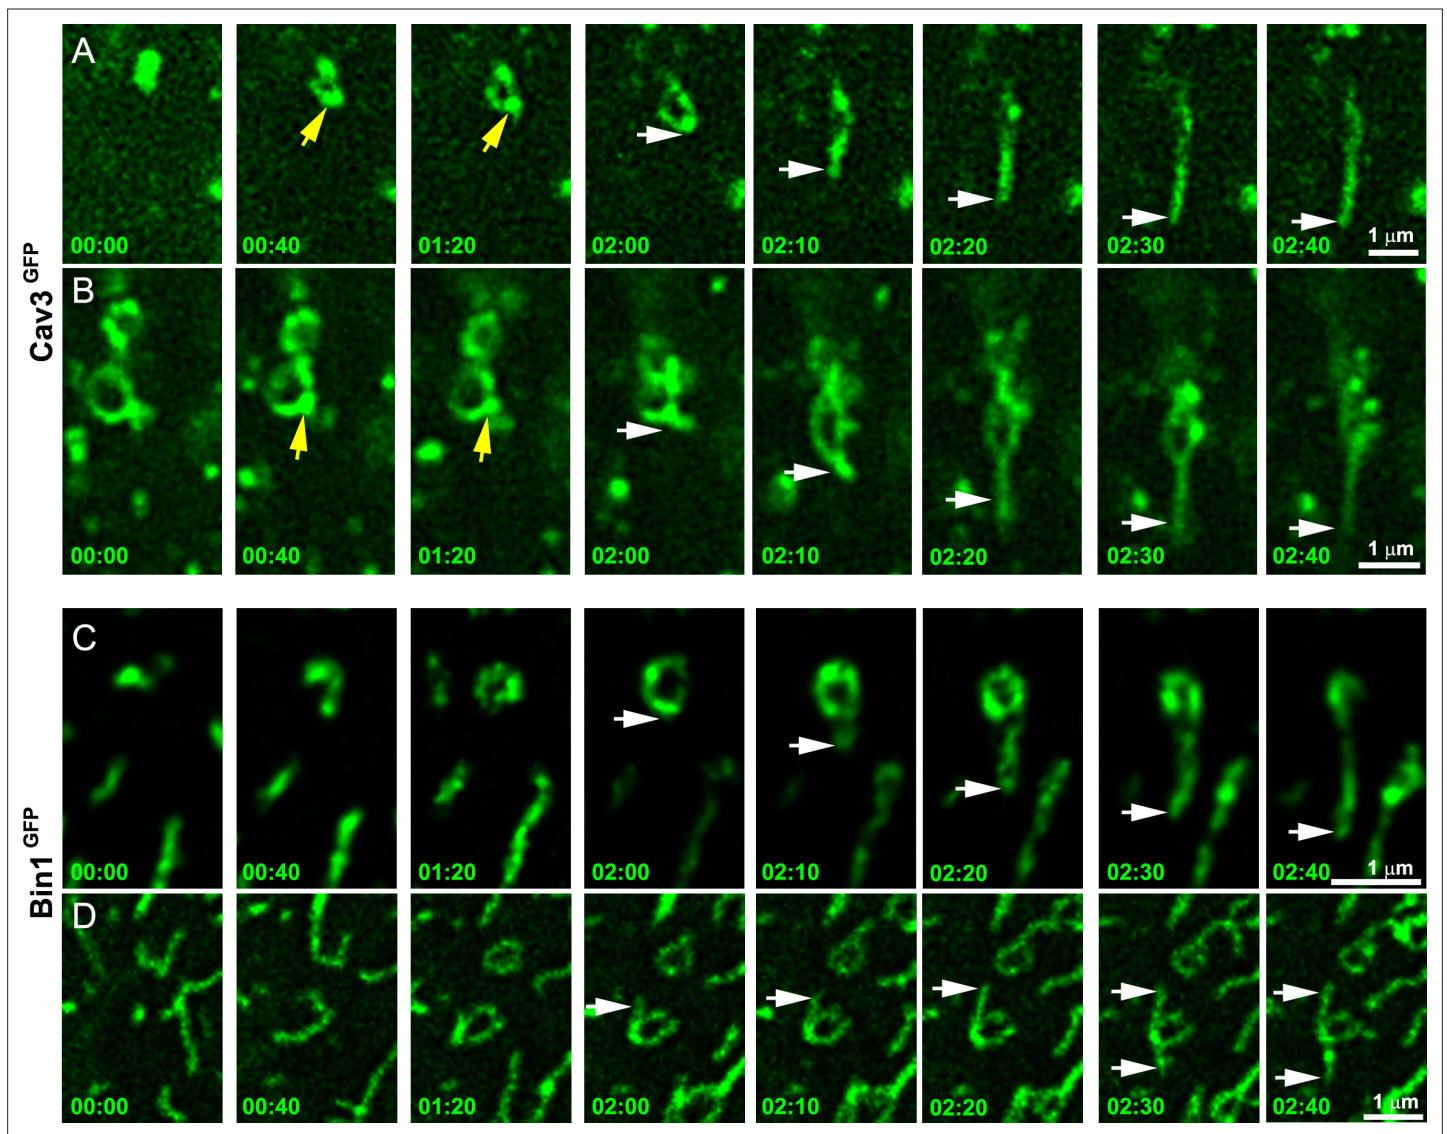

**Figure 4.** Time-lapse imaging of Cav3/Bin1 tubules extending from rings. (A) Gallery of consecutive frames from two time-lapse sequences of Cav3<sup>GFP</sup> expressing human myotubes (green). The gallery shows four consecutive frames every 40 s followed by four consecutive frames every 10 s of a tubule emanating from a ring (see **Figure 4—video 1** and **Figure 4—video 2**). Yellow arrows denote appearance of a Cav3 spot on the ring prior to tubulation. White arrows point to the edge of the tubule as it elongates away from the ring. (C–D) Gallery of consecutive frames from a time-lapse sequence of a Bin1<sup>GFP</sup> expressing human myotubes (green). The gallery shows a tubule emanating from a ring (see **Figure 4—video 3** and **Figure 4—video 4**). Time is indicated for each frame as min:s.

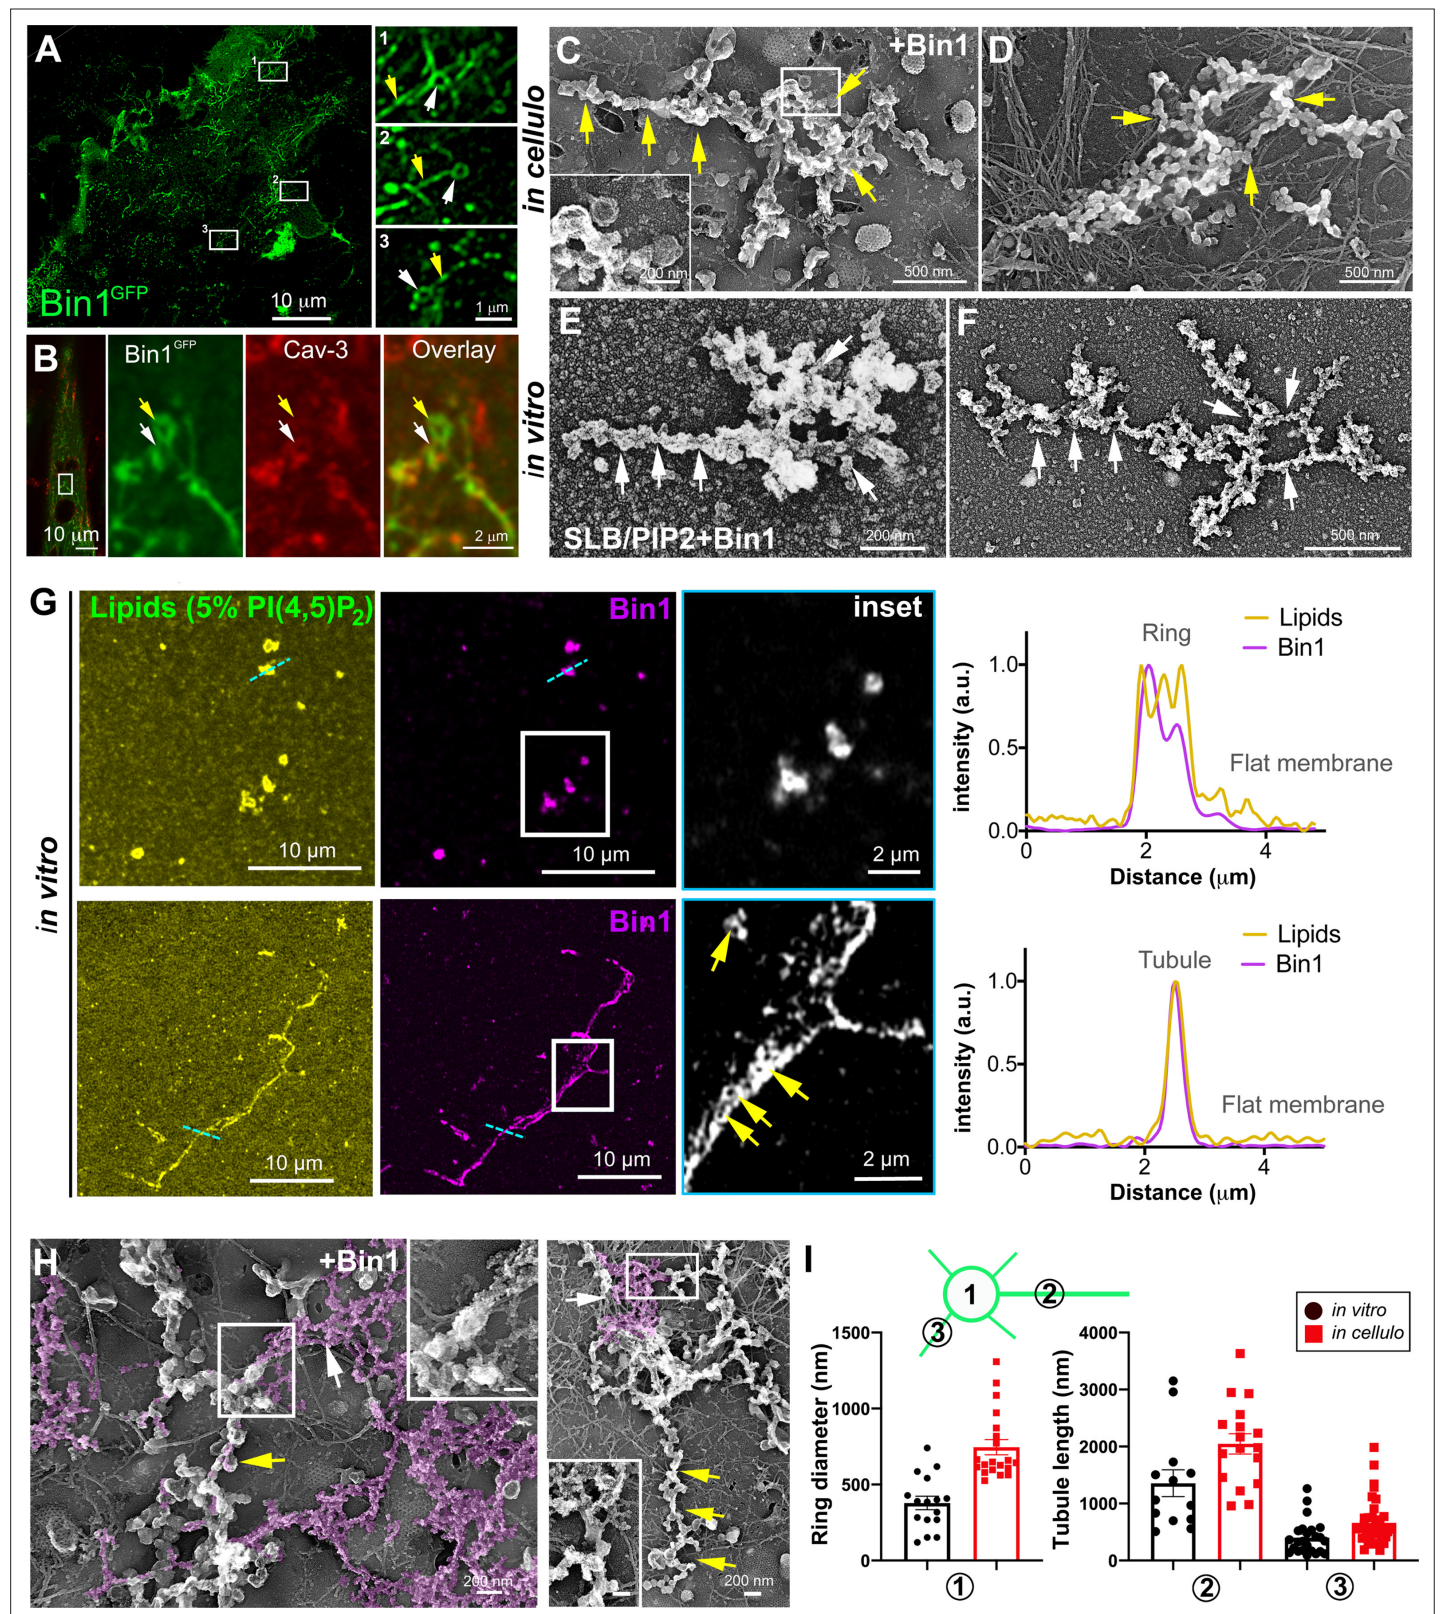

**Figure 5.** Bin1 forms rings and tubes in vitro and in cellulo. **(A)** Super-resolution fluorescence microscopy image of an unroofed human myotube transduced with Bin1<sup>GFP</sup> (green). Insets numbered 1–3 show the circular organization (white arrowheads) of the structures formed by Bin1 and from which tubes emanate (yellow arrows). **(B)** Super-resolution microscopy image of Bin1<sup>GFP</sup> and Cav3 labeling in an intact cultured human myotube. White arrowheads show Cav3 co-localization with Bin1 on both the rings and at the base of the tubules while yellow arrowheads show rings only positive for Bin1.

Figure 5 continued on next page



## Figure 5 continued

Bin1. **(C–D)** PREM images of unroofed myotubes transduced with Bin1<sup>GFP</sup>. White arrows indicate the central ring-like structure and yellow arrows indicate formation of beaded tubes emanating from the central ring. **(E–F)** PREM images of artificial lipid bilayers incubated with recombinant full-length Bin1. **(G)** Representative airyscan images of supported lipid bilayers (SLBs) containing 5% mol PI4,5P<sub>2</sub> and doped with 0.1% of fluorescent lipid dye (DHPE-Oregon green, yellow) and incubated with 1 μM of Bin1-Alexa647 (magenta). Insets show a magnification of Bin1 organization in ring-like structures and tubes (grey) from the corresponding image. Cross-section analysis along the blue dashed line in the related image highlights the intensity profile of Bin1 (magenta) and lipids (yellow) on the flat membrane. Bin1 ring-like organization is present in the membrane and tubular structures (yellow arrows). **(H)** PREM images of unroofed human myotubes transduced with an adenovirus expressing Bin1<sup>GFP</sup>. Yellow arrows show the formation of beaded tubular structures emanating from rings. A Bin1 scaffold similar to the one observed in vitro is pseudo-colored in purple and indicated with white arrows. **(I)** Cartoon of a central ring from which a central pearled tubule and numerous smaller tubules emerge radially. **(1)** Diameter of the rings (in vitro, 16 rings from n=13 images; in cellulo, 20 rings from n=18 images; p<0.0001). **(2)** Length of the longest tubule emanating from Bin1 assemblies (in vitro, 13 tubes from n=13 images; in cellulo, 17 tubes from n=17 images; p<0.05). **(3)** Length of the smaller tubules emanating from Bin1 assemblies (in vitro, 47 small tubes from n=13 images; in cellulo, 72 small tubes from n=18; p<0.05).

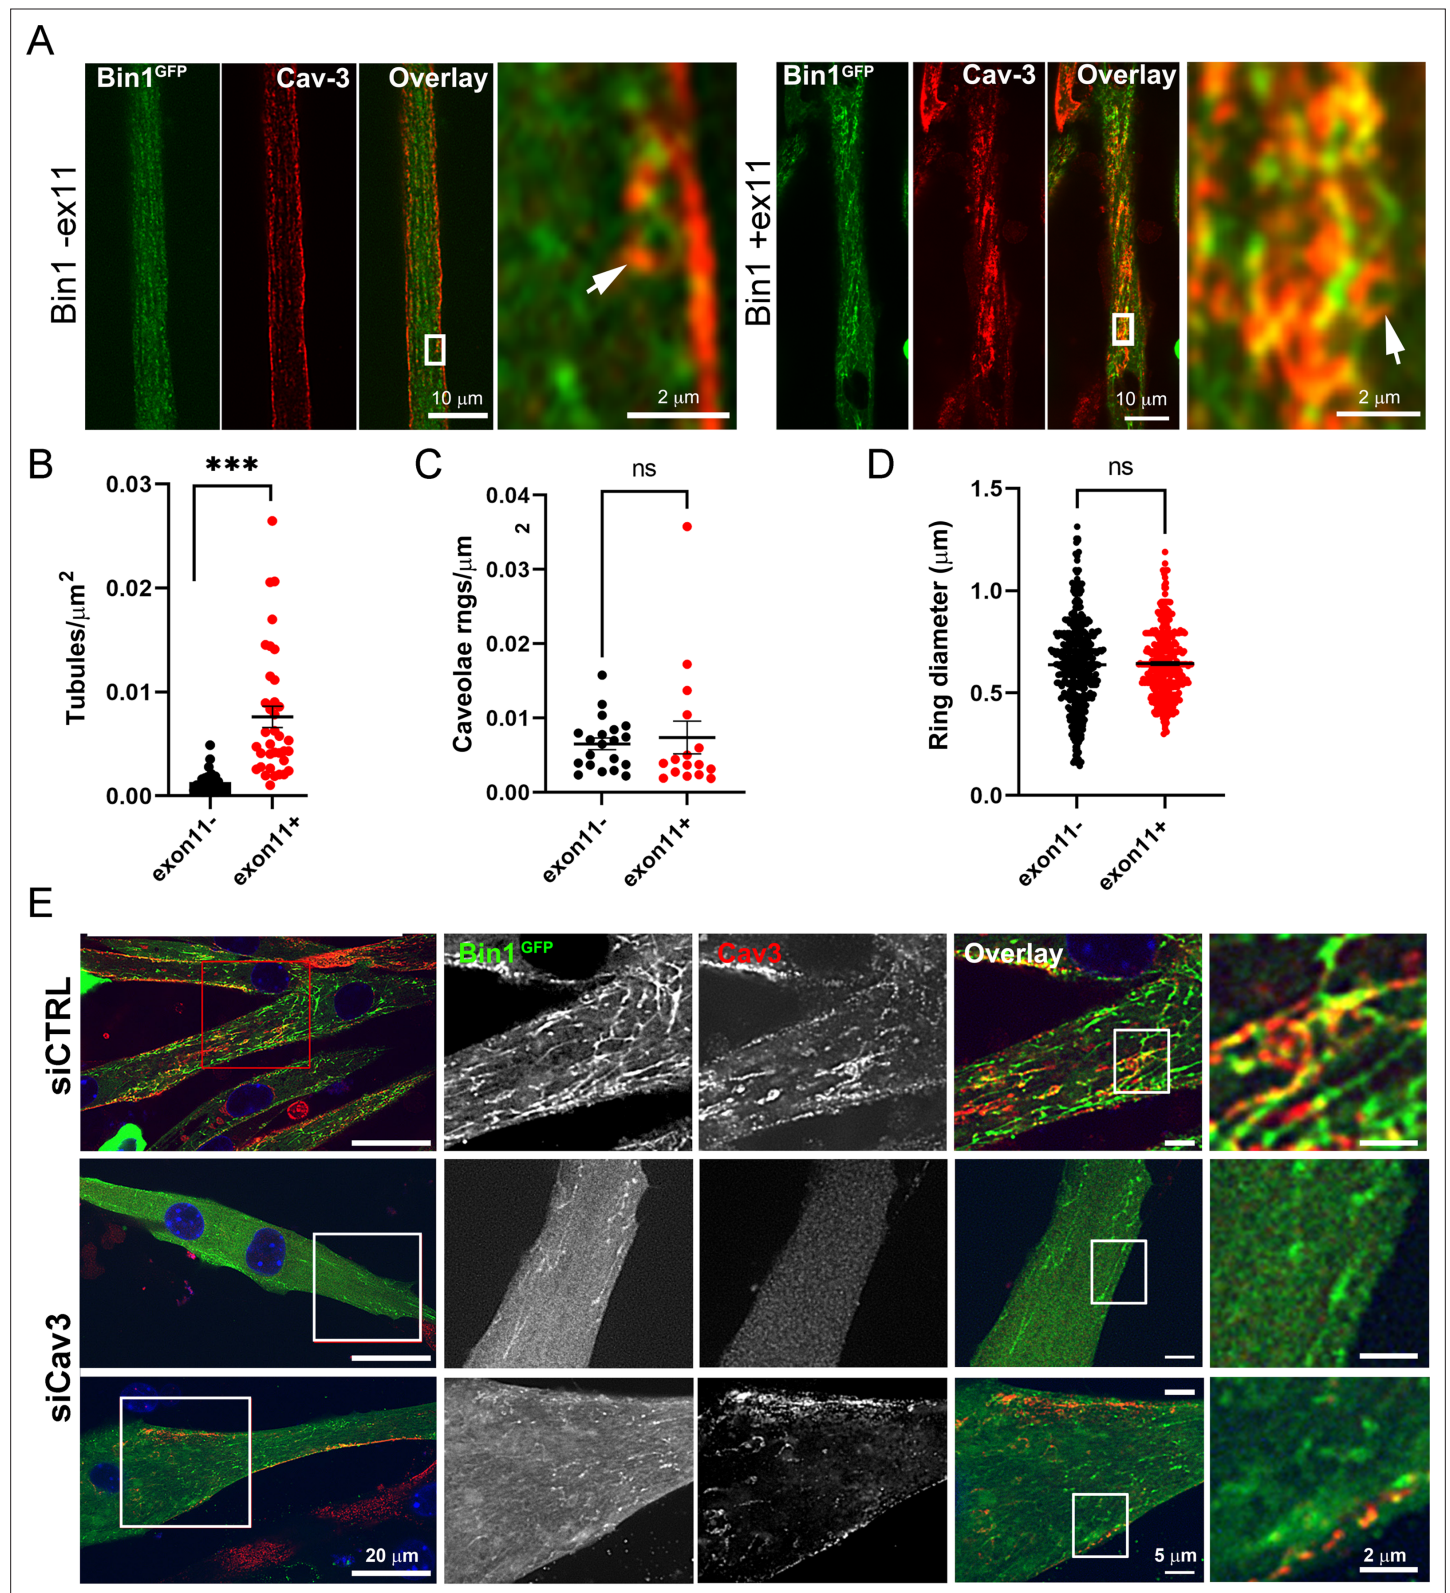

**Figure 5—figure supplement 1.** Bin1 tubulation assay in mouse myotubes. **(A)** Immunofluorescence images of murine primary myotubes transduced with adenoviruses expressing either Bin1<sup>GFP</sup> or Bin1-ex11<sup>GFP</sup> and labeled with antibodies against Cav3 (red). Note the presence of rings and absence of tubes in the Bin1-exon11<sup>GFP</sup> construct (white arrows) and the abundance of tubules in myotubes expressing Bin1<sup>GFP</sup>. **(B)** Quantification of tubule density from super-resolution images of differentiated myotubes either expressing Bin1-exon11<sup>GFP</sup> or Bin1+exon11<sup>GFP</sup> (Bin1-exon11<sup>GFP</sup>, n=21 myotubes from Figure 5—figure supplement 1 continued on next page



*Figure 5—figure supplement 1 continued*

three independent experiments; Bin1+exon11<sup>GFP</sup>, n=14 myotubes from three independent experiments; <0.001). **(C)** Quantification of caveolae density from super-resolution images of differentiated myotubes either expressing Bin1-exon11<sup>GFP</sup> or Bin1+exon11<sup>GFP</sup> (Bin1-exon11<sup>GFP</sup>, n=20 myotubes from three independent experiments; Bin1+exon11<sup>GFP</sup>, n=16 myotubes from three independent experiments; p=0.71). **(D)** Quantification of caveolae ring diameter from super-resolution images of differentiated myotubes either expressing Bin1-exon11<sup>GFP</sup> or Bin1+exon11<sup>GFP</sup> (Bin1-exon11<sup>GFP</sup>, n=387 rings from three independent experiments; Bin1+exon11<sup>GFP</sup>, n=357 rings from three independent experiments; p=0.66). **(E)** Immunofluorescence images of murine primary myotubes transfected with Bin1<sup>GFP</sup> in either control or myotubes depleted of Cav3 after siRNA treatment.

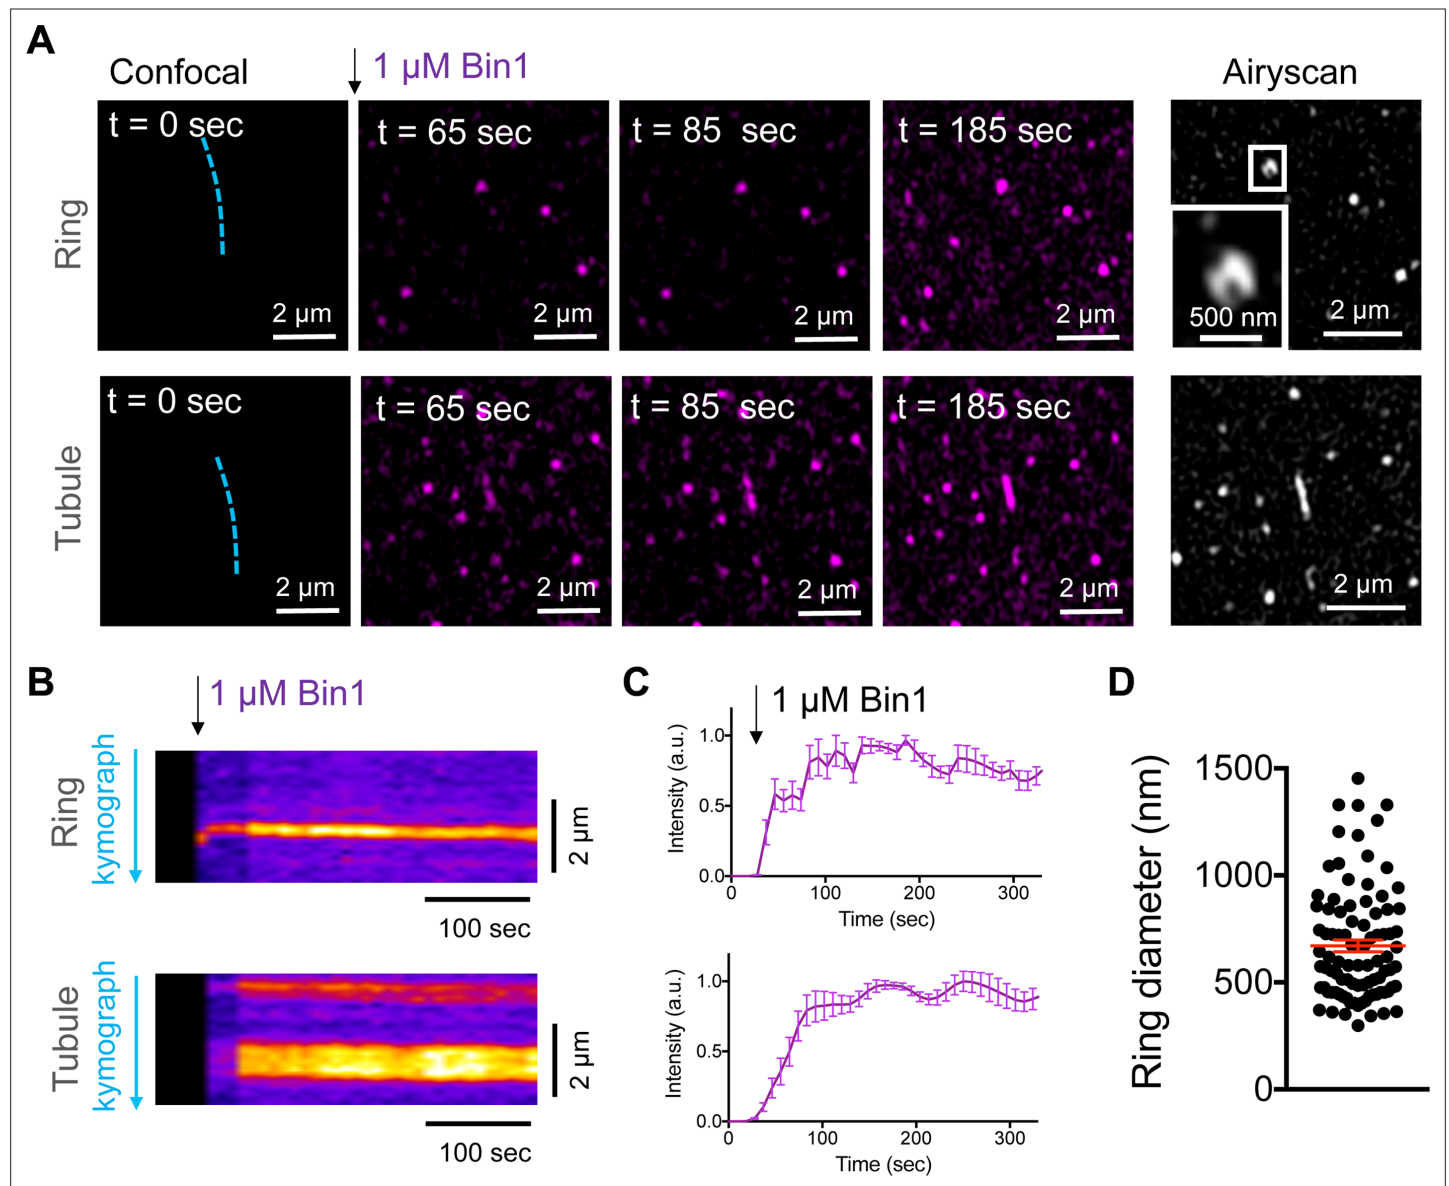

**Figure 5—figure supplement 2.** Bin1 forms persistent rings and tubules in vitro. **(A)** Confocal time-lapse images showing the dynamics of 1  $\mu\text{M}$  Bin1-Alexa647 (magenta) organization in rings and tubes on 5% mol PI4,5P<sub>2</sub>-containing membranes. Airyscan image acquired at the same region of the corresponding confocal image at t=185 sec. **(B)** Kymograph analysis along the blue dashed line in A. **(C)** Fluorescence quantification over time of Bin1-Alexa647 signal on a ring (top) and tubule (bottom) assemblies. Each curve represents the mean  $\pm$  s.d. of n=7 kinetics from two experimental replicates. **(D)** Diameter distribution of Bin1 rings (in nm) on lipid bilayers containing 5 % mol of PI4,5P<sub>2</sub>. The number of rings analyzed was n=92.



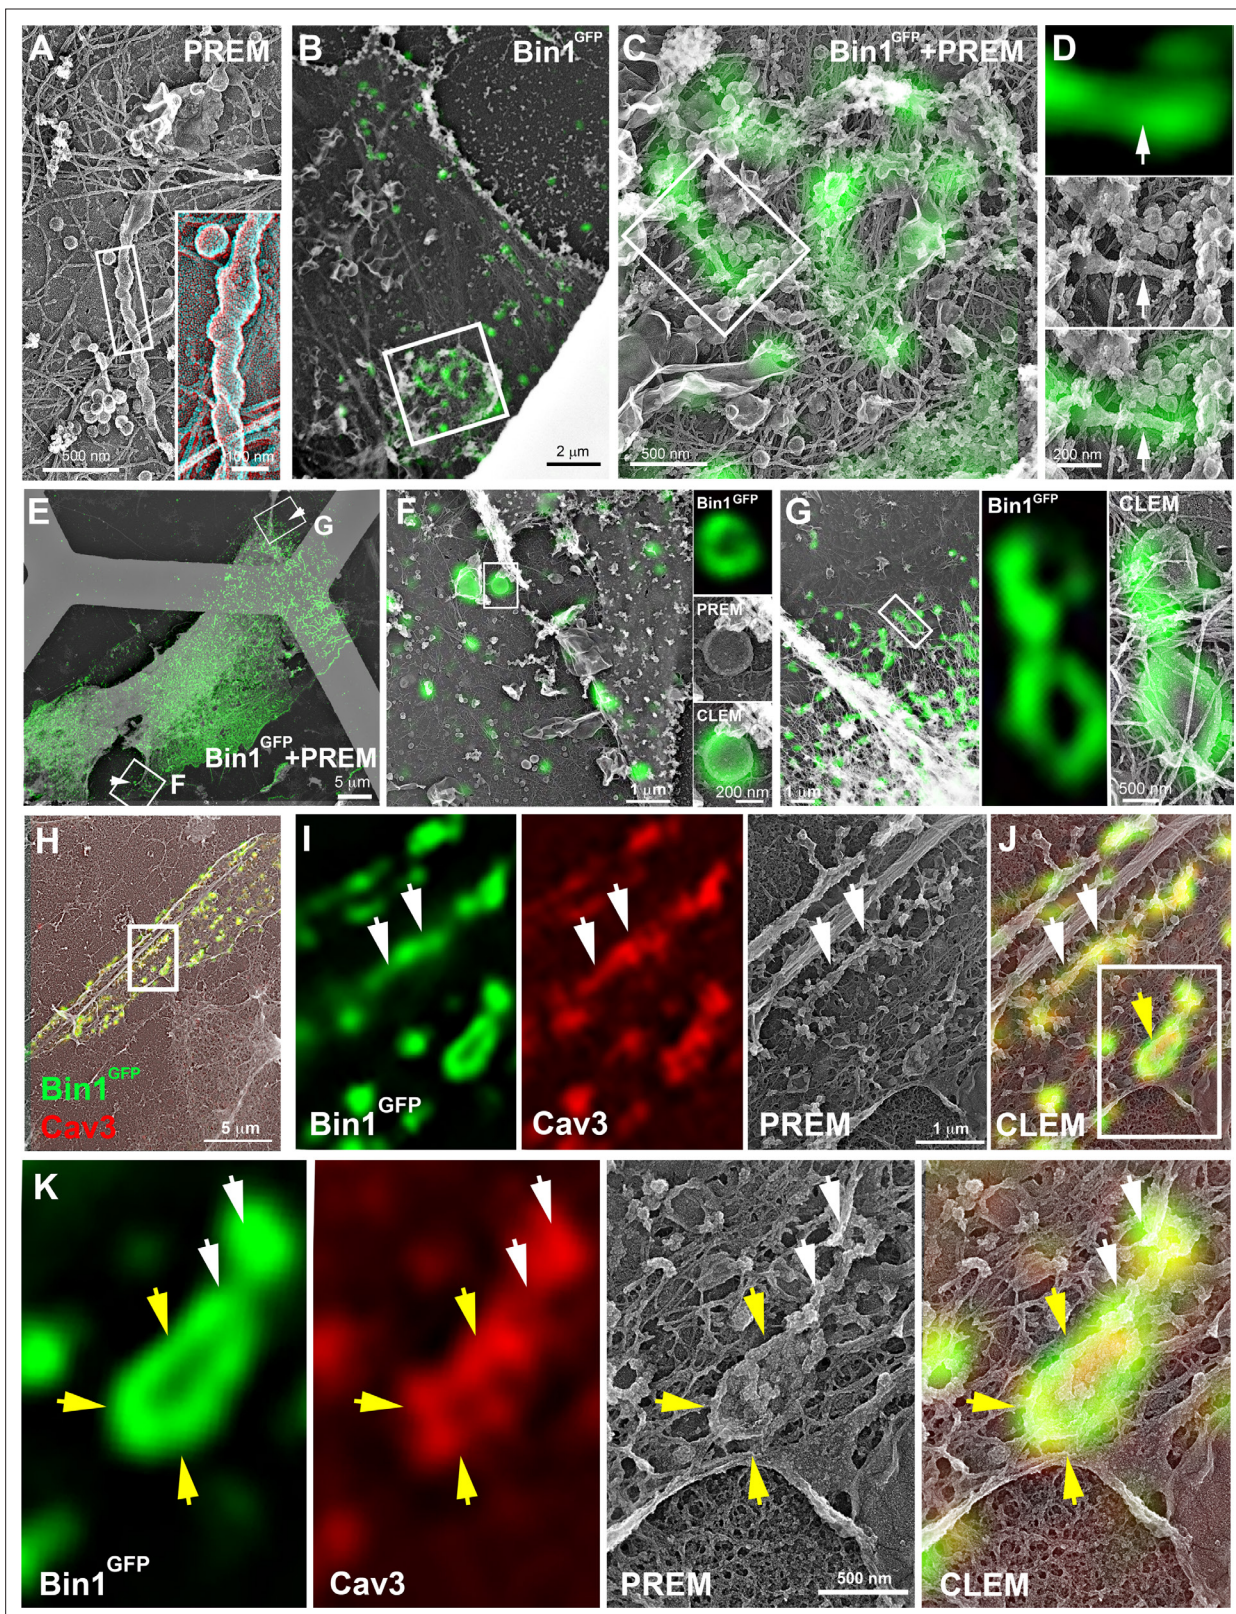

**Figure 6.** CLEM evidence of Bin1 tubules and rings in human and murine myotubes. (A) High magnification PREM image of an unroofed human myotube transduced with an adenovirus expressing Bin1<sup>GFP</sup> forming a characteristic pearled tubule with caveolar material. A 3D anaglyph of the tubule next to a single caveolae with a similar proteinaceous coat is shown in the inset (use red/cyan glasses for viewing). (B–G) Correlative LM and PREM images from human myotubes transduced with Bin1<sup>GFP</sup> (green). (F and G) Correlative LM and PREM overlay images corresponding to insets in (E). (H) Figure 6 continued on next page

*Figure 6 continued*

CLEM overlay of extensively differentiated murine myotubes transduced with Bin1<sup>GFP</sup> (green) and labeled with antibodies against Cav3 (red). **(I–J)** High magnification PREM views of the inset in **(H)**. Bin1<sup>GFP</sup> and Cav3 labeling on beaded tubes (white arrows) and rings (yellow arrows). **(K)** High magnification views of the inset in **(J)**. Bin1<sup>GFP</sup> (green) colocalized with Cav3 labeling (red) on beaded tubules (white arrows) emanating from rings (yellow arrows).



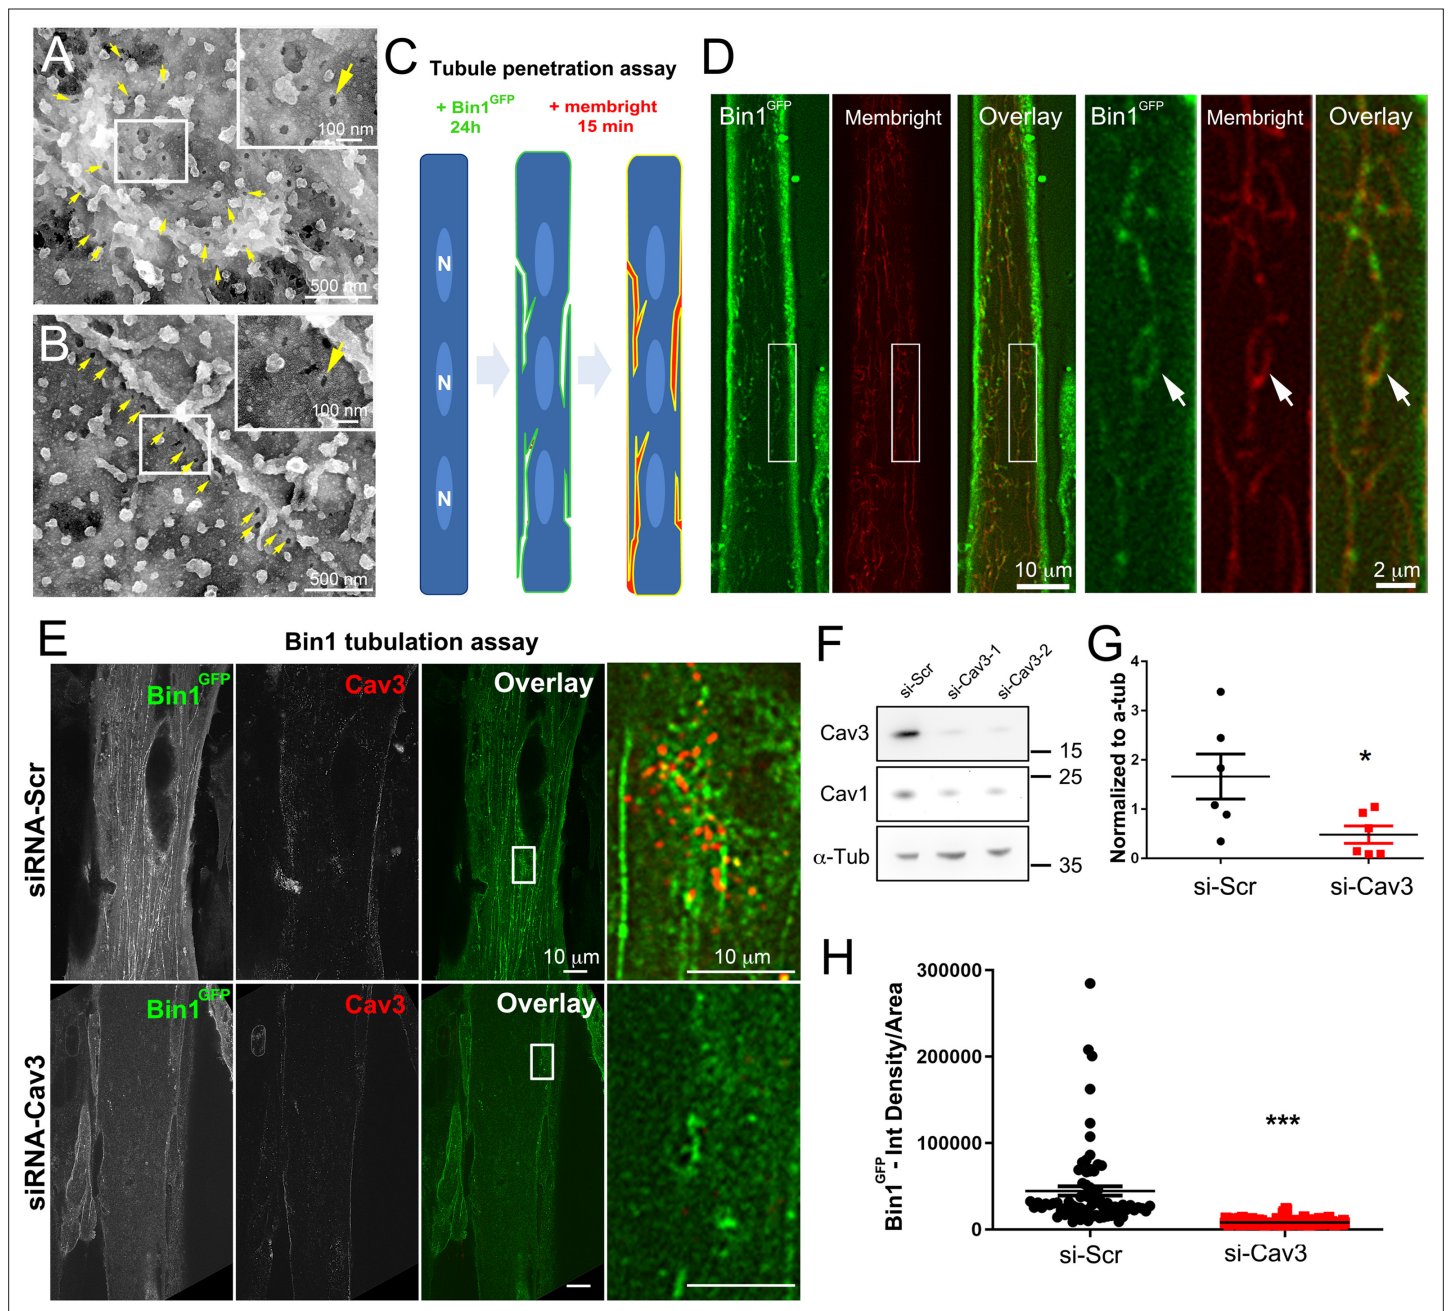

**Figure 7.** Bin1 tubules are in contact with the extracellular medium and depletion of Cav3 decreases Bin1-induced tubulation. (A–B) PREM images of intact myotubes transduced with Bin1<sup>GFP</sup>. Yellow arrows indicate necks of caveolae (25–40 nm) seen from the extracellular side of the plasma membrane organized in a circular (A) or linear (B) fashion. (C) Schematic of the MemBright tubule penetration assay. Multi-nucleated myotubes (blue) expressing Bin1<sup>GFP</sup> are incubated for 15 min with the impermeable lipid probe (red). (N=nucleus). (D) Sub-diffracted light microscopy images of cultured murine myotubes transduced with Bin1<sup>GFP</sup> (green) and incubated with an impermeable lipid probe (red) for 15 min. White arrows in the insets denote ring-like structures positive for both Bin1<sup>GFP</sup> and MemBright signal. (E) Immunofluorescent staining of primary human myotubes at 9 days of differentiation transduced with Bin1<sup>GFP</sup>. In control cells, Bin1<sup>GFP</sup> overexpression results in abundant membrane tubulation and the appearance of a dense network of tubes. Cav3 deficiency in siRNA-treated myotubes results in a dramatic decrease in tubulation. (F) Western-blot analysis of Cav3 and Cav1 protein levels in differentiated myotubes treated with two different siRNAs directed against Cav3 (si-Cav3) and a scramble siRNA (si-Scr). (G) Quantification of Cav3 protein levels in cultured myotubes treated with siRNAs directed against Cav3 or scramble siRNA (n=3 independent experiments, p<0.05). (H) Quantification of Bin1<sup>GFP</sup> fluorescence intensity in cultured control and si-Cav3 myotubes transduced with Bin1<sup>GFP</sup> (si-Scr, 78 myotubes from n=25 images; si-Cav3, 130 myotubes from n=50 images; p<0.0001 from at least three independent experiments).



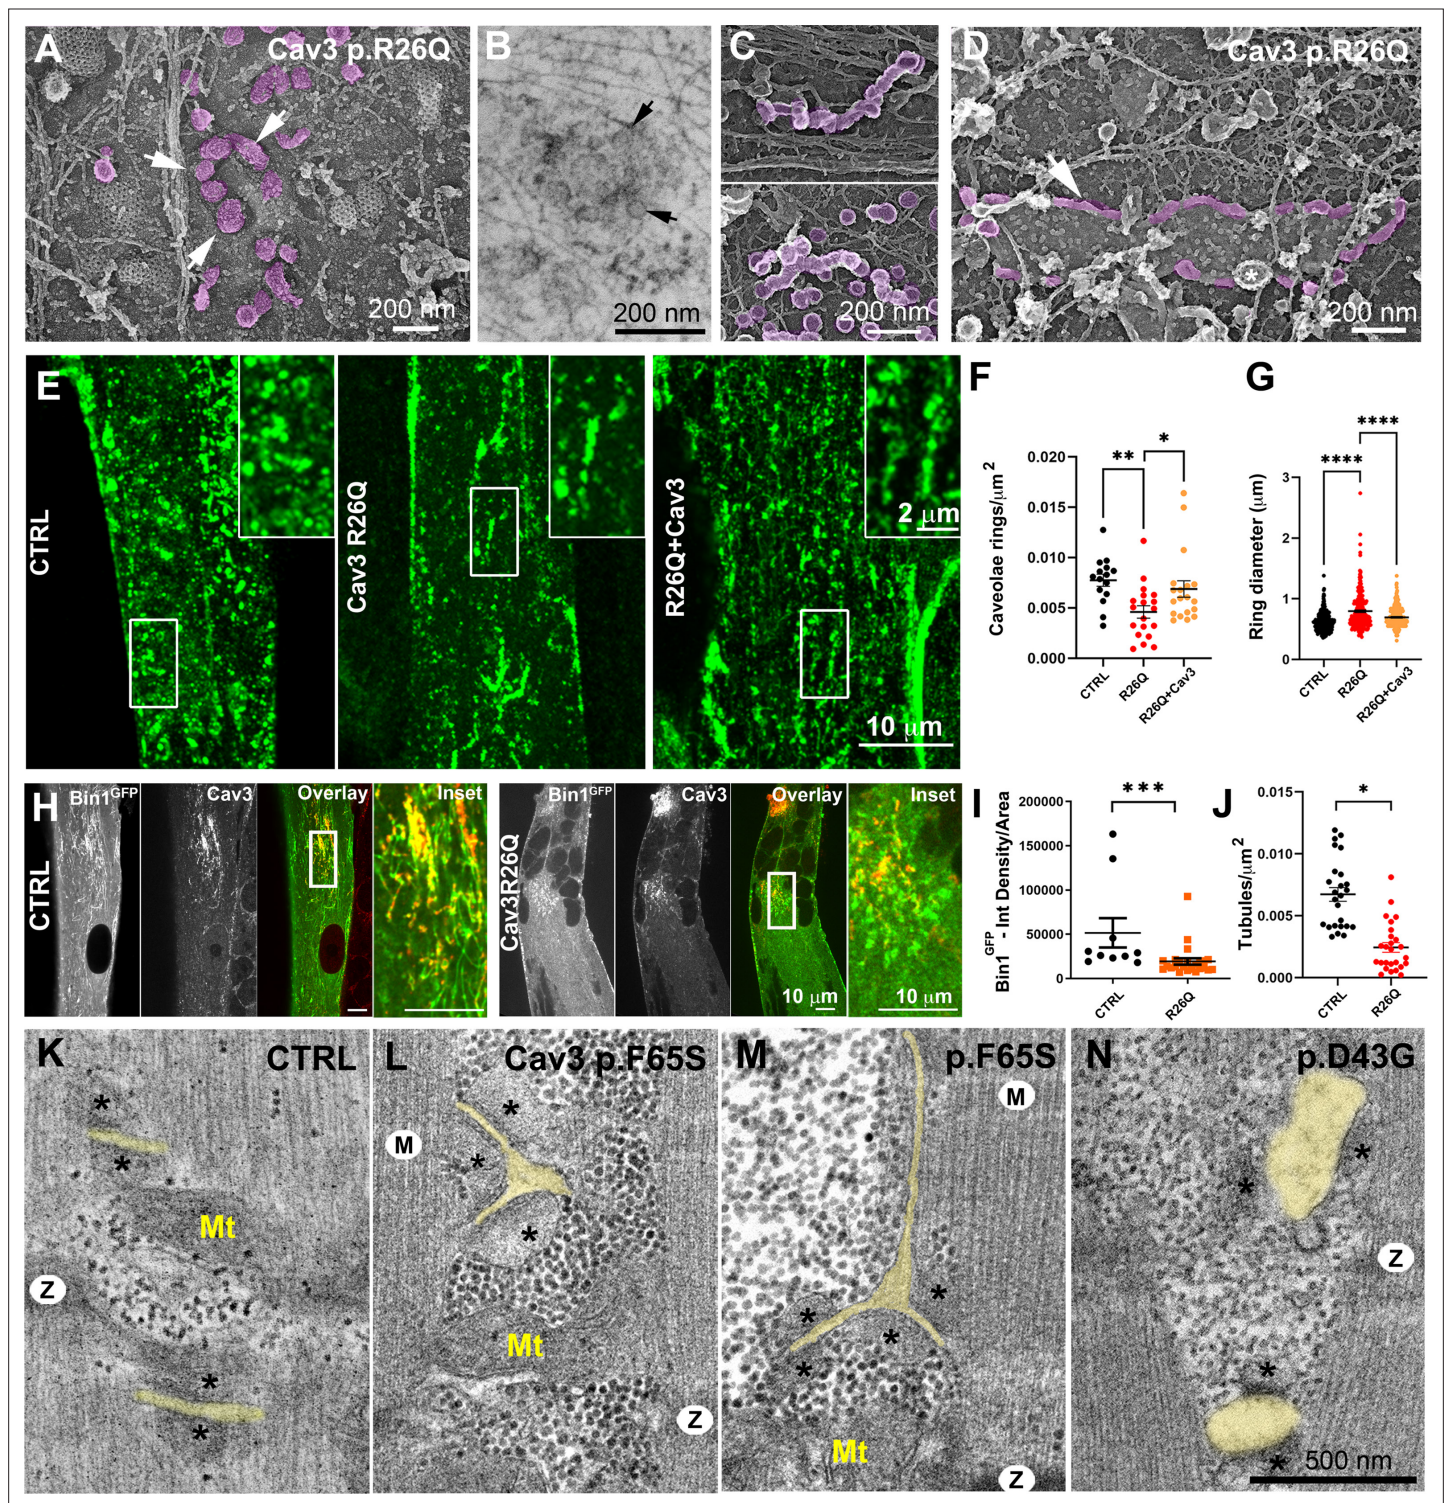

**Figure 8.** Cav3 mutations disorganize caveolae rings in patient-derived cells and T-tubules in patient muscle biopsies. (A) High-magnification PREM images of caveolae rings on the cytosolic side of the plasma membrane of sonicated myotubes from patients with the Cav3 R26Q mutation. Caveolae are pseudocolored purple and display an altered structure and spatial organization (white arrows denote individual caveolae with an altered morphology). (B) High-magnification view of a caveolae ring from a patient myotube with the R26Q mutation observed by thin-section EM. Black arrows indicate caveolae forming a loose ring-like structure. (C) High-magnification PREM images of small tubes made of 5–10 concatenated caveolae in unroofed myotubes from patients with Cav3 R26Q mutation. (D) High-magnification view of a giant (>2  $\mu\text{m}$  major axis) caveolae oval-like structure (pseudo-colored in purple) in an unroofed myotube from Cav3 R26Q mutation. White star indicates a clathrin-coated pit. (E) Immunofluorescent staining

Figure 8 continued on next page



## Figure 8 continued

of control, R26Q patient myotubes and R26Q patient myotubes expressing full length Cav3. **(F)** Quantification of caveolae ring density from super-resolution images of differentiated control myotubes, caveolinopathy patient myotubes or caveolinopathy patient myotubes with the R26Q mutation stably expressing Cav3<sup>GFP</sup> (CTRL, n=15 myotubes from three independent experiments; R26Q, n=19 myotubes from three independent experiments; R26Q+Cav3, n=19 myotubes from three independent experiments). **(G)** Quantification of caveolae ring diameter from super-resolution images of differentiated control myotubes, caveolinopathy patient myotubes or caveolinopathy patient myotubes with the R26Q mutation stably expressing Cav3<sup>GFP</sup> (CTRL, n=310 rings from three independent experiments; R26Q, n=219 rings from three independent experiments; R26Q+Cav3, n=670 rings from three independent experiments). **(H)** Immunofluorescent staining of control and Cav3 R26Q patient myotubes transduced with Bin1<sup>GFP</sup>. In control cells, Bin1<sup>GFP</sup> overexpression results in excessive membrane tubulation and appearance of a dense network of tubes. Cav3 deficiency in patient myotubes results in a dramatic decrease in tubulation. **(I)** Quantification of Bin1<sup>GFP</sup> fluorescence intensity in cultured control and patient myotubes transduced with Bin1<sup>GFP</sup>. The Cav3 R26Q mutation results in a significant decrease in Bin1 labeling. (CTRL, 10 myotubes from n=8 images; Cav3 R26Q, 24 myotubes from n=16 images; p<0.001 from at least three independent experiments). **(J)** Quantification of tubule density from super-resolution images of differentiated myotubes either expressing Bin1-exon11<sup>GFP</sup> or Bin1+exon11<sup>GFP</sup> (Bin1-exon11<sup>GFP</sup>, n=21 myotubes from three independent experiments; Bin1+exon11<sup>GFP</sup>, n=14 myotubes from three independent experiments; p<0.001). **(K–N)** High magnification thin-section EM images of muscle biopsies from a control subject **(K)** and patients with either Cav3 F65S **(L and M)** or D43G mutations **(N)**. SR terminal cisternae are denoted with black asterisks. T-tubules are pseudo-colored pale yellow. Mitochondria (Mt), Z-Disk (Z), M-band (M). In **(L)** and **(M)** T-tubules form abnormal bifurcations. Instances of T-tubule swelling **(N)** are also observed in patient biopsies.

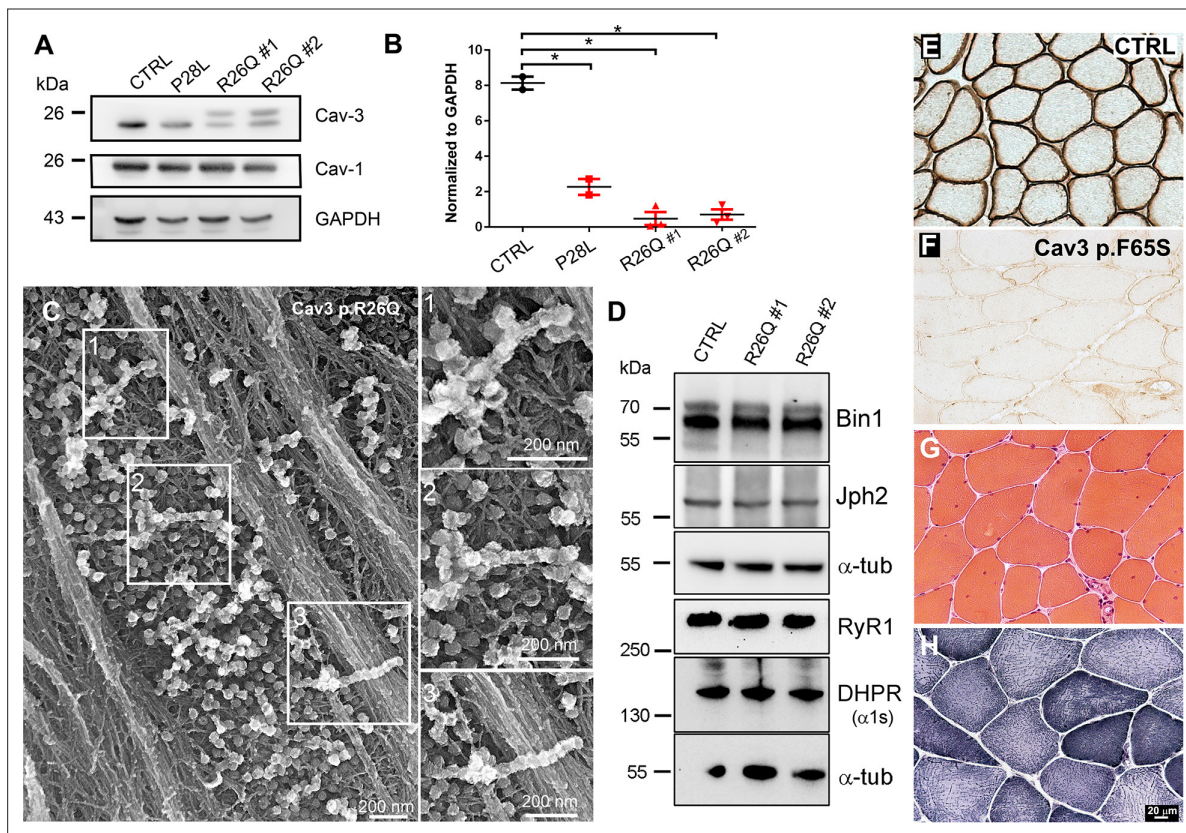

**Figure 8—figure supplement 1.** Cav3 protein levels and characteristic ultrastructure of beaded caveolae tubes in caveolinopathy patient myotubes and characteristic histology of caveolinopathy patient muscle biopsies. **(A)** Western-blot analysis of Cav3 protein levels in myotubes from patients with P28L and R26Q mutations (n=3 independent experiments). **(B)** Densitometric quantification of Cav3 protein levels relative to GAPDH levels. **(C)** High magnification PREM views of unroofed immortalized human myotubes with the Cav3 R26Q mutation after extensive differentiation (21 days). Note the presence of beaded tubes made of 5–10 concatenated caveolae in regions with abundant caveolae. **(D)** Western-blot analysis of Bin1, Juncophilin 2, RyR1 and DHPR  $\alpha$ 1s-subunit protein levels in myotubes from control and two caveolinopathy patients with R26Q mutations (n=3 independent experiments). **(E–F)** Immunohistochemical labeling of Cav3 in muscle biopsy from a control subject or from a patient with p.F65S Cav3 mutation reveals a strong reduction in Cav3 labeling. **(G)** Hematoxylin and Eosin staining on muscle sections from the patient displays some centralized and internalized nuclei. **(H)** NADH-TR reaction C on muscle sections from the same patient.



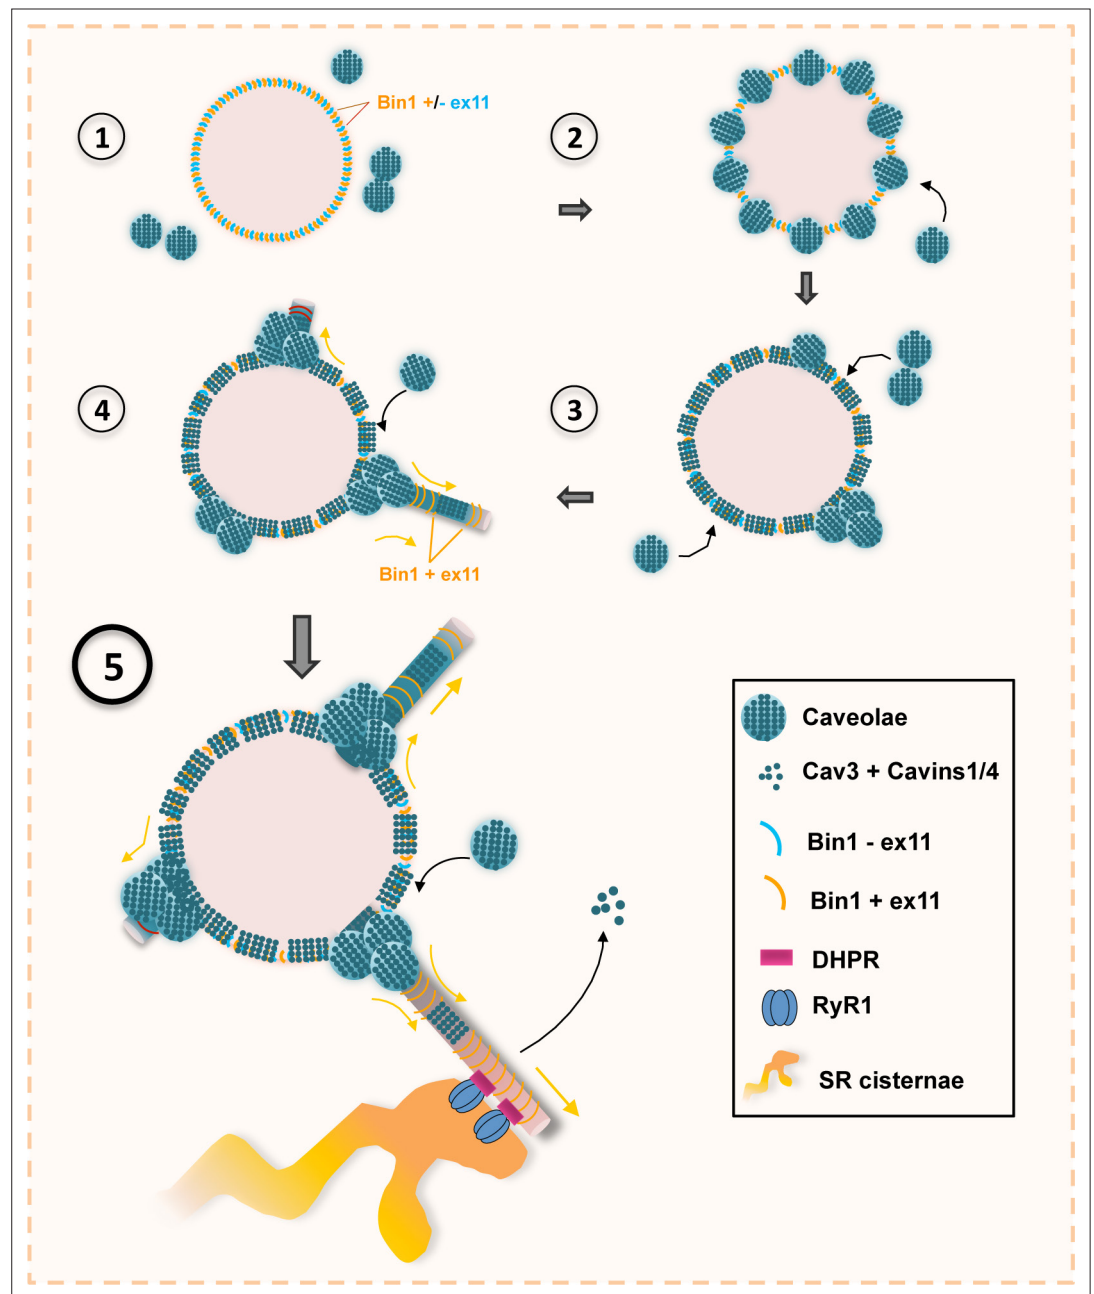

**Figure 9.** Model of Bin1 and Cav3-mediated ring formation and tubulation. (1) Bin1 molecules polymerize into ring-like structures and recruit Cav3-positive caveolae. (2) Caveolae assemble into circular structures while additional caveolae accumulate at specific spots on the ring periphery. (3) Bin1-positive tubules emanate from regions where caveolae accumulate. (4-5) Tubules containing the  $\alpha 1s$ -subunit of the DHPR elongate from the central ring and start forming contacts with RyR1-positive SR cisternae. Caveolar material is either removed from the tubule or diffuses along the tubule membrane.
